1 **Title: Inside-out Signalling From Aminopeptidase N (CD13) To Complement**  
2 **Receptor 3 (CR3, CD11b/CD18)**

3  
4 **Authors:** Laura Díaz-Alvarez<sup>1,2\*†</sup>, Mariana Esther Martínez-Sánchez<sup>3</sup>, Eleanor Gray<sup>4</sup>, Enrique  
5 Ortega<sup>1\*</sup>

6  
7 **Affiliations:**

8 <sup>1</sup>Departamento de Inmunología, Instituto de Investigaciones Biomédicas, Universidad Nacional  
9 Autónoma de México; Mexico City, Mexico.

10 <sup>2</sup>Posgrado en Ciencias Biológicas, Unidad de Posgrado, UNAM; Mexico City, Mexico.

11 <sup>3</sup>Instituto Nacional de Enfermedades Respiratorias “Dr. Ismael Cosío Villegas”; Mexico City,  
12 Mexico.

13 <sup>4</sup>London Centre for Nanotechnology, Department of Physics and Astronomy, University College  
14 London: London, United Kingdom

15 \*Corresponding authors: [laura.diaz-alvarez@ciencias.unam.mx](mailto:laura.diaz-alvarez@ciencias.unam.mx), [ortsoto@biomedicas.unam.mx](mailto:ortsoto@biomedicas.unam.mx)

16 †This article is dedicated to the memory of Dr. Heliodoro Celis Sandoval, friend and mentor who  
17 will be dearly missed.

18  
19 **Abstract:** Upon ligand engagement, certain receptors can activate an integrin through a  
20 mechanism called inside-out signalling. This phenomenon prepares the cell for the next steps of  
21 the process it will perform. CR3 (Complement receptor 3), the most abundant  $\beta 2$  integrin in

22 monocytes and macrophages, and CD13 (aminopeptidase N) are two immune receptors with  
23 overlapping activities: adhesion, phagocytosis of opsonized particles, and respiratory burst  
24 induction. They can be found together in functional signalling microdomains, or lipid rafts, on  
25 the surface of human leukocytes. Thus, given their common functions, shared physical location  
26 and the fact that some phagocytic and adhesion receptors activate a selection of integrins, we  
27 hypothesized that CD13 could activate CR3 through an inside-out signalling mechanism. To test  
28 this hypothesis, we first ascertained the activation of CR3 after CD13 crosslinking in human  
29 monocyte-derived macrophages. We used an integrated analysis of bioinformatics and  
30 experimental data to suggest two possible signalling cascades that could explain the  
31 phenomenon. Finally, we show that the non-receptor tyrosine kinase Syk is a key attenuator of  
32 this pathway. Our results demonstrated that, even in the absence of canonical signalling motifs,  
33 and despite having a noticeably short cytoplasmic tail (7-10 amino acids), CD13 was capable of  
34 triggering an inside-out signalling cascade, adding a new function to those already known for  
35 this moonlighting protein.

36

37

38

39 **One Sentence Summary:** Stimulation of CD13 activated the integrin CR3 via an inside-out  
40 signalling pathway, a mechanistic model is proposed.

41

42

43

44 **Main Text:**

45 **INTRODUCTION**

46 CD13 is a cell-membrane ectoenzyme (E.C.3.4.11.2) also known as aminopeptidase N due to its  
47 capacity to cleave N-terminal (preferentially neutral) amino acid residues (aa) from peptides,  
48 CD13 enzymatic activity is Zn<sup>2+</sup>-dependent; thus it is considered to be a metalloproteinase.  
49 CD13 is expressed in a number of cell types such as several epithelia, myeloid cells and during  
50 the early stages of lymphocyte differentiation (1). Most of its 960 aa are located extracellularly;  
51 roughly 25 aa constitute the transmembrane portion and only 7-10 aa correspond to the  
52 intracellular portion of the protein (2). The intracellular and extracellular segments of CD13 have  
53 distinct functions. The enzymatic activity is located on the extracellular domains, and accounts  
54 for CD13's role in the processing of bioactive peptides. The intracellular portion, on the other  
55 hand, is able to mediate signal transduction when the receptor is crosslinked in a peptidase  
56 activity-independent fashion. In this way, CD13 mediates cellular processes like phagocytosis,  
57 cell migration and adhesion (3–5). Signal transduction takes place despite the shortness of the  
58 intracellular tail with only, the presence of a single potential p-Tyr and the absence of classical  
59 signalling sequences like ITAMs. Due to the range activities of CD13, it is considered as a  
60 “moonlighting” protein.

61

62 Complement receptor 3 (CR3) is a member of a group of membrane proteins called  $\alpha/\beta$   
63 integrins. These are cell surface molecules that have functions related to cell-cell and cell-  
64 extracellular matrix (ECM) adhesion. Additionally, some integrins mediate respiratory burst, and  
65 phagocytosis. The  $\alpha/\beta$  integrins are heterodimers comprised of one  $\alpha$  and one  $\beta$  chain. There are

66 18 mammalian genes coding  $\alpha$  chains and 8 coding  $\beta$  chains that form the 24  $\alpha/\beta$  integrins  
67 reported in vertebrates (6). Integrins are grouped based on their  $\beta$  chains. Heterodimers with the  
68 constant  $\beta$  chain is CD18 are called  $\beta 2$  integrins; a family of four members that is expressed in  
69 leukocytes, where the variable  $\alpha$  chain is either  $\alpha L$ ,  $\alpha M$ ,  $\alpha X$  or  $\alpha D$ , also referred to as CD11a, b,  
70 c, or d, respectively. CR3 corresponds to the CD11b/CD18 combination and is also known as  
71 Mac-1 and integrin  $\alpha M/\beta 2$ . The CD11b and CD18 subunits are 155-165 kDa and 94 kDa  
72 polypeptides, respectively (7, 8).

73  
74 CR3 is primarily expressed in leukocytes like neutrophils, monocytes, macrophages, and  
75 dendritic cells (9). Two main physiological roles have been described for CR3. Firstly, it acts as a  
76 phagocytic receptor for particles and pathogens opsonized with iC3b complement fragments.  
77 Such pathogens are engulfed and subsequently destroyed by the phagocytes (reviewed in (10)).  
78 Secondly, CR3 is an adhesion molecule that participates in leukocyte extravasation during  
79 inflammation. This is due to its ability to bind ligands present on endothelial cells, such as  
80 ICAM-1, ICAM-2, JAM-A, JAM-C, and RAGE (11, 12).

81  
82 Integrins can exist in three conformations: open, closed, and intermediate. These are causally  
83 related to ligand affinity, that is, high, low, and intermediate affinities, correspondingly. The  
84 larger and best-known of their integrin ligands like fibrinogen, collagen, and fibronectin, can  
85 only bind integrins in the open conformation. Thus, this conformation can be considered to be  
86 the fully activated state of the receptor. However, smaller ligands and peptides bearing the  
87 sequence Arg-Gly-Asp can interact with the closed receptor. The intermediate-affinity state can

88 be regarded as an additional inactive state since the extracellular ligand-binding site is not  
89 exposed, however, intracellular signals can interact with the receptor in this conformation  
90 (reviewed in (13, 14)).

91

92 Immune receptors like CD13 and CR3 do not operate as isolated entities, they are part of an  
93 array of molecules and intracellular signalling events that act in concert to promote cellular  
94 functions. Upon ligand engagement by a receptor, two different types of signal transduction  
95 events can be distinguished. The first is called outside-in signalling, where an external signal is  
96 transmitted to the inside of the cell. This process is mediated by the sequential activation of  
97 intracellular molecules such as tyrosine kinases, GTPases, nuclear factors, etc, that culminate in  
98 a cellular function like gene expression, release of soluble mediators, polymerization of the actin  
99 cytoskeleton, and others. The second type of event is known as inside-out signalling, where an  
100 internal signal changes the conformation of receptors that face the outside of the cell. This  
101 process also involves the stimulation of a series of tyrosine kinases and phosphatases, GDP-GTP  
102 exchanging factors, etc, but in this case the pathway results in the activation of a different  
103 cellular receptor. Inside-out signalling can be seen as the pre-activation of the surface molecules  
104 required for the next stages of a cellular process. For example, polymorphonuclear leukocytes in  
105 circulation must slow down prior to its firm adhesion to the endothelium and extravasation.  
106 During the initial interaction of leukocytes with endothelial cells, chemokines and selectins  
107 binding to their receptors on the endothelium activate integrins like LFA-1, CR3 and VLA-4 via  
108 inside-out signalling, which launches the next phase of extravasation: firm adhesion (15).

109 The activation of CR3, that is the transition from its low affinity to its high affinity  
110 conformations, occurs either through ligand recognition (outside-in signalling) or via an

111 intracellular signal coming from a different cell surface receptor (inside-out signalling). The  
112 events triggered by either signalling pathway generally recruit distinct effectors, for example,  
113 following engagement of the extracellular effector Mindin, CR3 outside-in signalling results in  
114 the activation of the MAPK pathway and translocation of NF- $\kappa$ b into the nucleus (16). In  
115 contrast, stimulation of G-protein coupled receptors results in the transition of CR3 from its low-  
116 affinity to its high-affinity state via an inside-out signalling pathway that includes the activation  
117 of phospholipases C $\beta$ 2 and C $\beta$ 3, and the calcium- and diacylglycerol-regulated guanine  
118 nucleotide exchange factor I (reviewed in (9)). Some molecules can participate in both CR3  
119 inside-out and outside-in signalling, including Rap1, RIAM, Talin, Kindlin and Syk (9, 17–20).

120

121 Syk (Spleen tyrosine kinase) is a 72 kDa non-receptor tyrosine kinase containing two SH2  
122 domains and an active site-bearing domain. It is a key player in the immune system,  
123 orchestrating a wide range of responses such as Fc $\gamma$ R-mediated phagocytosis, and BCR  
124 activation, (reviewed in (21, 22)). The canonical mechanism for Syk activation involves a post-  
125 stimulation conformational change that allows Tyr-containing sequences called ITAMs on the  
126 receptor, to be phosphorylated by a protein kinase of the Src family. This creates a docking site  
127 to which Syk binds through its SH2 domains, causing Syk to be activated by auto-  
128 phosphorylation. Once detached from the ITAM, Syk continues to phosphorylate its downstream  
129 substrates, until phosphatases like SHP-1 and SHP-2, deactivate it and signal transduction stops,  
130 (reviewed in (23)). Syk participates in a variety of signalling cascades, including those induced by  
131 the moonlighting ectoenzymes CD38 and CD13 (3, 24).

132

133 Our group previously found that upon CD13 stimulation, Syk is phosphorylated and the adaptor  
134 molecule Grb2 and the Ras-GEF Sos1 co-precipitate with the receptor (3, 25). Additionally,  
135 research from our laboratory and others demonstrated that CD13 crosslinking by monoclonal  
136 antibodies (mAbs) enhances cellular functions mediated by other receptors such as FcγRs, other  
137 matrix metalloproteases and, most likely, scavenger receptors (26–28). For example, Mina-Osorio  
138 and Ortega (26) showed that co-crosslinking of CD13 and CD64 (FcγRI) synergistically  
139 augments both the efficiency of phagocytosis, and the duration of Syk phosphorylation in human  
140 monocytic cells.

141  
142 In summary: i) integrins like CR3 can be activated by engagement of other receptors through a  
143 mechanism known as inside-out signalling, and ii) CD13 and CR3 share some of their mediated  
144 functions (phagocytosis, adhesion, and respiratory burst). Moreover, CD13 and CR3 can be  
145 found in physical proximity as both are present in lipid rafts (29), which is a strong indicator of a  
146 functional relationship. Finally, a link between the surface expression of CD13 and a different  
147 integrin ( $\alpha_v\beta_3$ ) has already been recognized in breast cancer (30). In this work we report the  
148 possibility of the existence of a signalling pathway that links CR3 and CD13 in human  
149 monocyte-derived macrophages (MDMs), employing an integrated analysis of bioinformatics  
150 and experimental data.

151  
152 First, we ascertained that CD13 crosslinking by antibodies causes the activation of CR3. Second,  
153 we establish that Syk is an attenuator of the inside-out signalling cascade initiated by CD13  
154 crosslinking. Third, we interrogated molecular ontology bioinformatic databases, ran text mining

155 analyses and manually curated a functional protein interaction network to suggest the  
156 components of the CD13-CR3 signal transduction pathway. Our findings have implications for  
157 the study of conditions in which the expression of CD13 is related to disease progression, as it is  
158 in breast cancer, where CD13 is related to the development of metastases (31), a phenomenon  
159 largely driven by integrins.

160

## 161 **RESULTS**

### 162 **CD13 crosslinking resulted in the activation of CR3 (CD11b/CD18)**

163 CR3 can exist in two main conformational states that correspond to a high or low affinity for its  
164 ligands, the active and inactive states, respectively. The high affinity state can be reached either  
165 by encountering its ligand (outside-in signalling) or by cell stimulation through other immune  
166 receptors, i.e. by inside-out signalling. Since CD13 crosslinking by antibodies increases the  
167 function of several receptors including those allowing the phagocytosis of zymosan, *E. coli* and  
168 IgG-opsonised particles (3, 27), we hypothesized that it could also promote the activation of  
169 integrins like CR3.

170 For this reason, we assessed the activation status of CR3 (CD11b/CD18) following CD13  
171 crosslinking on human MDMs. CD13 molecules on the surface of MDMs were crosslinked using  
172 Fab fragments of the anti-CD13 antibody mAb C (Fab C) as primary antibody and, G $\alpha$ M F(ab)<sup>2</sup>  
173 fragments as secondary antibody. Next, cells were stained with a FITC-anti-CD11b(activated)  
174 antibody and analysed in the flow cytometer. Cells were first gated for size and granularity (Fig.  
175 1A), then for singlets (Fig. 1B) and finally for median fluorescence intensity in the BL1 (FITC)  
176 channel (Fig. 1C and 1D). Fig. 1C shows the controls, i.e., unstained cells as well as cells



177 incubated either without primary and secondary antibodies (No Fab) or with only secondary  
178 antibody (No Fab + secondary) followed by staining with anti-CD11b(activated) antibody. The  
179 resulting histograms demonstrate that incubation in the absence of Fab C does not produce a  
180 nonspecific anti-CD11b(activated) signal. In contrast, in panel D it is possible to distinguish CR3  
181 activation in a representative sample of MDMs incubated with primary (Fab C) and secondary  
182 antibodies, i.e. after CD13-crosslinking. Fig. 1E shows the average and standard deviation of  
183 CD11b activation in CD13-crosslinked cells from a series of independent experiments. An  
184 average 43% ( $\pm 16.4$ ) of cells showed CD11b activation after CD13 crosslinking, while controls  
185 showed no activation. A one-way ANOVA followed by a Dunnett's multiple comparisons test  
186 confirms that the difference between samples and controls was statistically significant at 95%  
187 (Dunnett's CI95% -54 to -31). We ruled out the possibility that CR3 activation was not detected  
188 in all CD13 crosslinked cells due an incomplete occupation by Fab C. Fig. 1F shows a  
189 representative histogram from MDMs incubated with Fab C and a secondary antibody coupled to  
190 FITC, showing that Fab C bound efficiently to all cells.

191 CD13 crosslinking-dependent CR3 activation was specific for CD13, as crosslinking a different  
192 receptor (CD32) with anti-CD32 antibody fragments (Fab IV.3) did not elicit the same effect.  
193 Here CD32-crosslinked cells were treated and analysed in the same way as CD13-crosslinked  
194 cells. Fig. 2A and 2B show the gating process, first by size and granularity, then by the detection  
195 of singlets. The selected events were examined in the BL1 (FITC) channel as the anti-CD11b  
196 (activated) antibody was coupled to FITC. Fig. 2C displays representative histograms from  
197 CD13- and CD32-crosslinked cells, and their controls, where, as expected, only CD13-  
198 crosslinked MDMs were positive for the binding of the CD11b (activated) antibody. To validate  
199 this measurement, we repeated the assay twice more (Fig. 2D) and performed a one-way

200 ANOVA followed by a Dunnett's multiple comparisons test that confirmed the statistical  
201 significance of these results (Dunnett's CI 95% -32 to -16). The lack of CR3 activation in cells  
202 incubated with Fab IV.3 was nor due to poor binding of this Fab to the cells, as Fig. 2E shows  
203 that all cells were positive for Fab VI.3 binding. Therefore, our results confirmed that  
204 crosslinking CD13 on human MDMs induced the activation of CR3 in a specific fashion.

205

206 **The interaction network of CD13, Syk and CR3 (CD11b/CD18) functional partners**  
207 **contains 76 proteins**

208 The previous results showed that crosslinking CD13 on MDMs induced the high affinity  
209 conformation of CD11b. Next, we turned to bioinformatic databases to assemble an interaction  
210 network comprised of functional partners of CD13, CR3 and Syk, a key signalling kinase in the  
211 immune system, particularly in myeloid cells, in order to propose a sequential mechanistic model  
212 for the inside-out signalling pathway that could account for the activation of CR3 following  
213 CD13 crosslinking.

214 To determine the potential set of proteins and pathways that participate in the CD13-CR3 inside-  
215 out-signalling cascade we constructed an interaction network using information from public  
216 databases, literature, and previous experimental work from our laboratory. Given the high  
217 number of potential candidates, network nodes were selected by predicted interaction score,  
218 biological function, and presence in the target cell type.

219 A functional protein interaction network of CD13, Syk and CR3 was assembled selecting the  
220 proteins with the highest combined scores (0.8 or more) from the STRING database (32), as well  
221 as previously determined experimental interactions. Data mining STRING element, and the

222 databases GeneCards (33) and PubMed (34) were used to confirm that the chosen proteins were  
223 present in the myelomonocytic lineage. Fig. S1 presents the main ontology clusters for the  
224 selected proteins. For those interrogation nodes that resulted in more than 50 proteins with  
225 combined scores  $\geq 0.8$ , the top 50 molecules were analysed.

226 Using Syk as the interrogation query we obtained a first layer of interactions of 158 proteins with  
227 STRING combined scores above 0.9. Twenty-nine entries were selected according to the  
228 established criteria, i.e., representing CD13 and/or CR3 known functional interactors or potential  
229 elements for the inside-out signalling pathway connecting the two of them. Two of these proteins  
230 were also selected in the CD11b and CD18 analyses. Fig. S2 includes the proteins selected to  
231 assemble the network, and the Venn diagram allows identification of those molecules common to  
232 two or more interrogation queries. In the case of Syk, two of its interactors were also common  
233 with CD11b and CD18.

234 Polypeptide chains forming CR3 (CD11b (ITGAM) and CD18 (ITGB2)), were also subjected to  
235 this type of analysis. For CD11b, the first layer of interactions with STRING combined scores  
236 above 0.9 consisted of 167 proteins, resulting in 22 molecules of interest. Ten of these were also  
237 selected for CD18, as well as the two previously mentioned for both Syk and CD18.

238 Using CD18 as the interrogation query resulted in 184 interactors with a combined score  $\geq 0.9$ .  
239 Twenty-five molecules of interest were chosen, 13 of which were exclusive to CD18, and the  
240 rest were shared with Syk and CD11b, as aforementioned.

241 Using CD13 as the interrogation query yielded 27 molecules with STRING combined interaction  
242 scores of 0.8 and above, these were filtered to 4 proteins of interest using the criteria of being  
243 either downstream signal inhibitors or enhancers, adhesion molecules or co-receptors which,  
244 following text mining, might provide information on the signalling pathways necessary for

245 interaction with CD13. Finally, 12 proteins for which interaction with CD13 was previously  
246 experimentally determined (SYK, GRB2, PI3K, FAK, IQGAP1, SRC, JNK, p38, MEK-1, PKC,  
247 ERK 1/2 and SOS1) were added to the molecules of interest (5, 35, 36).

248 Fig. 3 depicts the interaction network obtained, consisting of 76 non-redundant proteins. Of note,  
249 pink lines and bubbles represent interactions experimentally determined, including the ones  
250 contributed by this study. A detailed list of all proteins in the network, their main characteristics,  
251 and their corresponding interrogation nodes, is presented in Table S1.

252 Next, based on our interaction network, we constructed a sequential mechanistic model of the  
253 CD13-CR3 inside-out signalling pathway.

254

255 **Sequential mechanistic model of the CD13 to CR3 (CD11b/CD18) inside-out signalling**  
256 **pathway.**

257 Unlike many other adhesion and phagocytic receptors, CD13 has only a short cytoplasmic tail  
258 with no canonical signalling motifs (36). However, this is not an impediment for acting as a  
259 trigger of phosphorylation cascades. Upon antibody crosslinking, CD13 dimers are  
260 phosphorylated on their intracellular portion (Tyr6), most likely by Src (5). Therefore, after  
261 demonstrating that CD13 crosslinking activated the integrin CR3, we blended the insights  
262 provided by these experiments with the information from our CD13-Syk-CR3 interaction  
263 network to propose a sequential mechanistic model for the CD13-CR3 inside-out signalling  
264 pathway, a depiction of which can be seen in Fig. 4.

265 Tyr6 phosphorylation on both crosslinked CD13 molecules may create a docking site for  
266 scaffolding or adaptor proteins like Grb2, Grap2 or Gab2. Subsequently, other molecules like

267 Sos1, Syk and other non-receptor tyrosine-kinases and phosphatases such as SHP-1 (PTPN6)  
268 could be recruited. The next step would be the auto-activation of Syk and detachment from the  
269 adaptor protein, although it is also plausible that Syk auto-phosphorylates upon binding to CD13  
270 directly on the Tyr6 docking site, as it does on ITAMs during FcγRs signalling. Syk may activate  
271 PLCγ2, which produces IP3 and DAG. As a consequence of IP3 production, Ca<sup>2+</sup> is released  
272 from the endoplasmic reticulum. One of the many Ca<sup>2+</sup>-dependent enzymes is Calpain, which  
273 then would cleave and activate Talin (TLN1/2) (reviewed in (37)). Then, Kindlin and Talin  
274 destabilize the CD18-CD11b interaction, specifically, because activated Talin interferes with the  
275 salt bridge between the integrin subunits (38). This would lead to CR3 transitioning from the low-  
276 affinity to the high-affinity state.

277 We decided to evaluate this hypothetical signalling pathway by experimentally inhibiting a key  
278 protein in many myelomonocytic cascades: Syk. If our assumptions were correct, the activation  
279 of CR3 would be diminished, if not completely abolished, by incubating the MDMs with BAY, a  
280 Syk inhibitor.

281

### 282 **Syk inhibition resulted in a higher number of CR3 (CD11b/CD18)-activated cells**

283 In order to evaluate the hypothesis of Syk as partly responsible for the activation of CD11b  
284 following CD13 crosslinking, MDMs were first incubated in serum-free medium for different  
285 time periods with BAY, before assessing CD13-induced activation of CR3.

286 The cells analysed in the flow cytometer were gated as described in figures one and two. Fig. 5A  
287 shows that histograms from cells incubated with BAY and, without antibodies or only with the  
288 secondary antibody used for crosslinking and stained with anti-CD11b(activated)-FITC, were not

289 displaced in comparison with the unstained control, meaning that there was no nonspecific  
290 CD11b activation generated by either handling the cells or the secondary antibody alone.  
291 However, when MDMs were incubated with Fab fragments of a primary anti-CD13 antibody  
292 (Fab C) and crosslinked with F(ab)'<sub>2</sub> G $\alpha$ M fragments, a clear signal was detected as depicted in  
293 the representative histograms in Fig. 5B, where CD11b was activated in average in 30% ( $\pm$ 16.7)  
294 of the control cells population. In contrast to what was expected, when cells were incubated with  
295 BAY, this percentage rose to an average of 54% ( $\pm$ 14.5). Fig. 5C is the graphical representation  
296 of all tested pairs of CD13-crosslinked cell samples in the presence of BAY and their  
297 corresponding controls. Median fluorescence intensity (MFI) also rose significantly in the  
298 presence of BAY, from an average of 487( $\pm$ 78) to 574 ( $\pm$ 115) arbitrary units (a.u.) (Fig. 5D).  
299 The percentage of CD11b activation and MFI were analysed using paired two-tailed t tests,  
300 which confirmed the statistical significance of the differences.

301 These observations suggested that our decision to evaluate the role of Syk, a key molecule for  
302 the immune system, especially in the myelomonocytic lineage, was appropriate since its  
303 inhibition revealed the inhibitory loop of the CD13 to CR3 inside-out signalling pathway. In  
304 order to adjust the sequential mechanistic model to one in which Syk is a signal controller, we  
305 revisited our interaction network to include at least one element that, upon phosphorylation,  
306 restrains the activation of CR3.

307

### 308 **Syk is an inhibitor of the CD13-CR3 (CD11b/CD18) inside-out signalling pathway**

309 Given this new experimental information, we modified the sequential mechanistic model initially  
310 proposed to include the suggested Syk-mediated inhibitory loop. The improved model included  
311 12 proteins and 11 interactions (Fig. 6). It integrated multiple mechanisms like the

312 phosphorylation of the ubiquitin ligase Cbl and the subsequent ubiquitination of one or more  
313 proteins from the signalling cascade. These results highlighted the importance and pragmatism of  
314 combining experimental and bioinformatic approaches to efficiently decipher the complex  
315 inhibitory or enhancing mechanisms that underlie signalling pathways.

316 Experimental data from cells incubated with BAY showed that Syk inhibition resulted in a  
317 higher number of cells with an activated-CD11b positive signal. Thus, the activation of CR3  
318 must proceed through a different mechanism than the one initially hypothesized.

319 Nevertheless, it was possible to retain the suggested initial events following CD13 crosslinking,  
320 that is, Tyr6 phosphorylation on both CD13 molecules by Src, creating a docking site for adaptor  
321 molecules like Grb2, Grap2 or CrkL. Then, Syk self-activation either prior to adaptor protein-  
322 CD13 interaction, via auto-phosphorylation by binding the CD13 phospho-tyrosines as it does  
323 with ITAMs on Fc receptors (reviewed in (39), or by binding the adaptor molecule at its SH2 or  
324 SH3 domains (40), after such molecules assemble in a CD13-adaptor complex.

325 In parallel, the Rap GEF, C3G would activate via its interaction with the adaptor protein, most  
326 likely CrkL (41), then it may catalyse the GDP/GTP exchange in Rap1. After phosphorylation by  
327 Fak and Src, the protein RIAM would bind to Rap1 through its Ras association domain, and to  
328 PIP2 within the cell membrane via its Pleckstrin domain (42). Alongside its binding to RIAM,  
329 Rap1 also anchors to the membrane, and interacts with the Talin-Kindlin axis, which would drive  
330 the transition of CR3 from its inactive to its active state. Rap1 is a key node in the inside-out  
331 activation of phagocytic integrins like CR3. This small GTPase is where the signals coming from  
332 different receptors such as those for some chemokines and cytokines, and certain TLRs,  
333 converge and result in integrin activation (43).

334 Finally, unlike in the originally proposed mechanism, Syk would phosphorylate members of the  
335 ubiquitin-protein ligase Cbl family, namely Cbl and Cbl-b, present in our interaction network  
336 (43). These ligases may ubiquitinate one or more components of the signalling pathway,  
337 including CD13. This would induce an inhibitory loop that halts the signal transduction inducing  
338 CR3 activation. Syk inhibition potentially interferes with this mechanism resulting in a higher  
339 degree of CR3 activation, as seen in our experiments with MDMs incubated with BAY.

340

## 341 **DISCUSSION**

342 Over the years the description of CD13 has gone from a marker of leukaemia to a co-receptor, to  
343 a moonlighting enzyme in its own right. This work contributes to show that CD13 is able to elicit  
344 not only outside-in signalling, but to triggered at least one inside-out signalling pathway, thus  
345 activating another immune receptor CR3 (CD11b/CD18) in a specific manner. Our data are in  
346 line with similar observations such as those from Ortiz-Stern and Rosales (44), who report the  
347 activation of a  $\beta$ 1 integrin after CD32b (Fc $\gamma$ RIIb) crosslinking. This demonstrates once more  
348 that, even in the absence of canonical signalling motifs, CD13 induces cell phenomena  
349 comparable to classical phagocytic receptors.

350 We assembled a functional protein interaction network for CD13, Syk and CR3 using previously  
351 published experimental data from our lab and others, as well as bioinformatic resources like  
352 STRING, GeneCards and PubMed databases. This network comprised 76 proteins and allowed  
353 us to filter the potential elements for the CD13-CR3 inside-out signalling pathway. The network  
354 was used to build a model for the sequence of events that concatenate CD13 crosslinking and  
355 CR3 activation. The hypothetical pathway was experimentally tested, and the model further  
356 refined, swiftly expanding the mechanistic understanding of a complex phenomenon such as a



357 inside-out signalling cascade. This highlights the synergy between in silico and experimental  
358 approaches. A summary of our workflow can be seen in Fig. S3.

359

360 Each step in our sequential mechanistic model (Fig. 4) and its subsequent modification (Fig. 6),  
361 was supported not only by STRING predicted interactions with the interrogation queries, but also  
362 by previous experimental data. This made both pathways theoretically conceivable. For example,  
363 we initially chose Grb2 as an adaptor molecule bridging CD13 and Syk because our group found  
364 in previous studies that crosslinked CD13 co-precipitates with Grb2, and this molecule associates  
365 with Shc, Src, Syk and SHP-1 during inside-out signalling between CD32a and  $\alpha$ IIB $\beta$ 3 integrin  
366 in human platelets (25, 45). We also suggested the activation of the recognized Syk substrate  
367 PLC $\gamma$ 2, whose activity ultimately sparks the release of Ca<sup>2+</sup> from the endoplasmic reticulum (39).  
368 Of note, Ca<sup>2+</sup> release is a known effect of CD13 crosslinking by specific antibodies (4).  
369 Additionally, similar inside-out signalling pathways are induced when PSGL-1 from human  
370 neutrophils binds its endothelial ligands, P- and E-selectins, resulting in the activation of  $\beta$ 2  
371 integrins CR3 and LFA-1 (CD11a/CD18) (reviewed in (9)).

372

373 The feasibility of this proposal was also supported by the findings of Zheng et al. (46), who  
374 reported that stimulation of glycoprotein VI leads to the activation of  $\alpha$ IIB $\beta$ 3 integrin in  
375 platelets, an effect dependent on the Syk-mediated phosphorylation of PLC $\gamma$ 2. Moreover, the  
376 activation of  $\alpha$ IIB $\beta$ 3 integrin is prevented by BAY 61-3606, the same chemical inhibitor used  
377 in our experiments. testing of our model, we established that the non-receptor tyrosine kinase  
378 Syk is an attenuator of the CD13-CR3 pathway, as its inhibitor BAY causes a statistically

379 significant increase in both the number of cells bearing activated CR3, and the number of  
380 activated CR3 molecules on their surface. Thus, our initial model was modified accordingly.  
381 Among the adjustments to the model were: i) the inclusion of the adaptor molecule CrkL, present  
382 in our interaction network, as a bridge between p-CD13 and the rest of the cascade, ii) the  
383 participation of the Rap GEF, C3G as the GDP/GTP exchanger for Rap1, justified by the  
384 presence in our interaction network of both its activator and substrate, CrkL and Rap1,  
385 respectively and, iii) the suggested ubiquitination of components of the cascade by a member of  
386 the Cbl family, which are Syk-stimulated ubiquitin-ligases. Of note, such chemical modification  
387 does not necessarily mean that targeted proteins would be degraded, they could be  
388 deubiquitinated in late endosomes and recycled back to the cytoplasm or cell membranes, as it  
389 occurs with a proportion of EGFR after signalling termination (reviewed in (46)).

390 Hence, when Syk was inhibited by BAY, this attenuating mechanism could not proceed in a  
391 timely manner, and further CR3 activation was registered compared to the samples incubated  
392 without BAY. This possibility is not unreasonable since Cbl-deficient murine bone marrow  
393 derived mononuclear phagocytes display enhanced  $\beta$ 2 integrin-mediated adhesion during inside-  
394 out dependent activation (47).

395 The fact that more than one pathway was proposed for CD13-dependent CD11b activation  
396 demonstrated that the number of candidates in the interaction network was rich enough to supply  
397 an ample number of protein options for different scenarios, provided that each individual step of  
398 the proposed pathway had been previously reported, as in the case of our mechanistic model. It  
399 also showed that the outcomes from different stimulation conditions are finely-tuned. In the case  
400 of CD13, we see two different roles for Syk, depending on the nutritional stress of the cell. For  
401 example, in our experiments when CD13 was crosslinked with antibodies after a period of

402 starvation (serum-free incubation), Syk functions as part of the inhibitory mechanism of the  
403 CD13-CR3 pathway. However, in previously reported data, when cells are incubated in serum-  
404 supplemented medium, along with a phagocytic prey, phagocytosis, and reactive oxygen species  
405 (ROS) production require that Syk acts as an activator (3).

406

407 This makes sense from a bioenergetic and evolutionary point of view, since the cell orchestrates  
408 its responses using almost the same group of proteins instead of producing an entirely different  
409 set for each function, i.e. those in which Syk acts as an activator (like phagocytosis and ROS  
410 production), and those in which Syk is an inhibitor (like CR3 activation). Furthermore, the link  
411 between CD13 and CR3 is also supported by *in vivo* evidence, as both molecules can be found  
412 together in functional microdomains within the cell membrane called lipid rafts (29). These  
413 structures are key to cell signalling since they bring components of specific pathways close  
414 together, thus, decreasing the possibility of fortuitous activation or blocking of signals from other  
415 cascades (reviewed in (48, 49)).

416

417 Our results also exposed a further level of complexity for the CD13-CR3 pathway as CD13  
418 crosslinking activated CR3 in a fraction of the treated MDMs population, and the inhibition of  
419 Syk augmented this fraction. However, such a rise was not observed across the entire population  
420 in any of the tested conditions. There are multiple possible explanations for this observation. The  
421 first one is that, the overlapping activity of other kinases, conceivably Src-family kinases like  
422 Lyn, may substitute for Syk when it is inhibited, by phosphorylating the suggested target in this  
423 pathway, Cbl (Cbl/Cbl-b) (50). A second possibility is that, as the antibody used for the  
424 assessment of CD11b activation (commercial mAb CBRM1/5) did not recognize its intermediate

425 affinity state, such a change was not quantified even though it may also be a consequence of  
426 triggering the CD13-CR3 signalling pathway. This is supported by the findings of Chung and  
427 colleagues (51), who detect both high- and intermediate-affinity specific epitopes on  $\beta$ 2 integrins  
428 upon TLRs stimulation in THP-1 monocytic cells using different monoclonal antibodies. A third  
429 possibility is that, in the absence of an additional stimulus, the CD13-induced activation signal  
430 was not sufficient to activate CR3 in every cell, as occurs in transformed human brain  
431 microvascular endothelial cells. When these cells are exposed to IL-1 $\beta$ , activation of  $\alpha$ 5 $\beta$ 1  
432 integrin rises, binding to fibronectin is enhanced and the subsequent signalling is increased,  
433 compared to unexposed cells (52).

434

435 Our results suggest that CD13 and CR3 bring about one or more cellular functions as an  
436 ensemble. One of them is adhesion. CD13 has long been implicated in pro-adhesive events for  
437 example, it induces homotypic aggregation in myeloid cells (53, 54) and plays a role in the  
438 invasiveness of osteosarcoma cells in vitro and in vivo (55). The adhesive properties of CR3  
439 (CD11b/CD18) are well known, as is its tendency to be activated after the stimulation of other  
440 receptors (inside-out signalling), in a variety of settings both beneficial and detrimental to the  
441 host. For example, CD44-mediated phagocytosis in murine macrophages triggers and is partially  
442 dependent on CD11b activation (56), potentially resulting in the destruction of the phagocytic  
443 prey. In contrast, recognition of human neutrophil antigen 3a by auto-antibodies triggers CD11b  
444 activation, causing neutrophil accumulation in the pulmonary microvasculature of some blood  
445 transfusion recipients, driving severe transfusion-related acute lung injury (57).

446

447 It is therefore conceivable that CD13 and CR3 take part in the same adhesion chain of events  
448 during inflammation-related transendothelial migration; our group previously reported that  
449 CD13-mediated adhesion to endothelial cells is integrin-independent (36), although it is  
450 important to note that CD11b is not among the integrins evaluated. Thus, it is possible that  
451 CD11b indeed contributes to this process, but at this stage it cannot be confirmed or ruled out.  
452 This would partially explain the observation that upon in vivo CD13-ligation transendothelial  
453 migration is impaired (36). Given that, as we demonstrated, CD11b activation is a consequence  
454 of CD13 stimulation, persistent CD13 engagement would render active CR3 in constant contact  
455 with its endothelial ligands like ICAM-1 and -2 (11), maintaining the cell in arrest in a Kindlin-  
456 dependent manner (12), or like with JAM-A, JAM-C and RAGE, triggering outside-in signalling  
457 and causing polarization and spreading (58) albeit to an extent that would block extravasation.

458

459 Another function possibly coordinated between CD13 and CR3 is phagocytosis, as both perform  
460 this cellular function. Licona-Limón and colleagues (3) demonstrated that CD13 is a primary  
461 phagocytic receptor, as phagocytic prey selectively directed towards CD13 are engulfed by  
462 human macrophages and THP-1 monocytes at the same rate as they engulf Fc $\gamma$ R-directed  
463 particles. Furthermore, when CD13 is expressed on HEK293 cells, which normally do not  
464 express this receptor, they are able to internalize the same type of phagocytic prey. As for CR3, it  
465 is well known for its participation in complement-mediated phagocytosis. The complement  
466 system is a series of circulating proteins mainly synthesized in the liver. The three complement  
467 activation pathways (classical, lectin and alternative) can be summarized as a series of successive  
468 protein cleavages resulting in the production of a C3 convertase, which splits the C3 protein into  
469 C3a and C3b fragments. C3b opsonizes pathogens and is further processed giving rise to iC3b

470 and C3dg (reviewed in (10)). iC3b-opsonized pathogens are recognized and phagocytosed  
471 through CR3. CR3-mediated phagocytosis is synergistically enhanced by other receptors, for  
472 example, *Francisella tularensis* is internalized in concert by CR3 and CR1, each binding their  
473 own ligands on the surface of the bacterium (59), or *Borrelia burgdorferi*, whereby  
474 internalization by human macrophages is orchestrated by CR3, CD14 and scavenger receptors  
475 (60). As CD13 also acts as co-receptor to other phagocytic receptors like FcγRs and Mannose  
476 receptors (26, 61), this may also be the case for its functional interaction with CR3.

477

478 One limitation of this study is that the functional consequences of CR3 transitioning from a low-  
479 affinity to a high-affinity state in response to CD13 stimulation were not explored. Therefore, we  
480 can only speculate about the possible scenarios where CD13-mediated CR3 activation could be  
481 biologically relevant. A second limitation is that, given the number of nodes in the protein  
482 interaction network, it may have been viable to propose one or more extra sequential mechanistic  
483 models for the CD13-CR3 signalling pathway. Such models could be a convenient backup  
484 resource in case that, upon further testing, the final model presented in this article proves not  
485 entirely accurate.

486

487 As detailed out by Santos et al. (35) and reviewed by our group (62) CD13 is part of a group of  
488 ectopeptidases, along with CD157, CD73, CD38 and CD26, that initiate signalling events upon  
489 stimulation. Despite the need for extra accessory proteins, the existence of receptors without  
490 tyrosine-kinase activity (nRTKs) like these ectopeptidases, may have been retained during  
491 evolution, providing a tighter cell activation control than receptor tyrosine kinases (RTKs).  
492 nRTKs are not prone to auto-phosphorylation upon stochastic encounters in the cell membrane.

493 In contrast, spontaneous activation is possible with RTKs, which is a great disadvantage in  
494 conditions where they are overexpressed as it can result in disease development. For example,  
495 human epidermal growth factor receptor 2 (HER2) is a RTK and its overexpression is linked to  
496 ovarian, prostatic, gastric, lung and breast cancers (63). Moreover, activation of HER2 is a  
497 recognized mechanism of resistance to endocrine treatment in several experimental models (64).

498

499 The results of our study highlight the fine-tuning of both inside-out and outside-in signalling  
500 involving a single receptor, CD13, as many of the same proteins participate in either pathway,  
501 however, with quite different consequences. Syk is a key activator in the outside-in signalling  
502 following CD13 and CR3 engagement (3, 16), however, we demonstrated the inhibitory role that  
503 this same soluble tyrosine kinase has in the inside-out communication between both receptors.

504

505 CD13 is overexpressed in many cancers, whereby adhesion and cell motility, a mechanistically  
506 closely related phenomenon, contribute decisively to tumour progression (65–67). Therefore,  
507 future research should be directed towards the functional impact of CD13 crosslinking on CR3-  
508 mediated adhesion and phagocytosis, i.e., the identification of the functions mediated in concert  
509 by these receptors. It will also be necessary to assess the participation of other components of the  
510 CD13-CR3 signalling pathway in vitro and, eventually in vivo. One option is to use a CRISPR-  
511 Cas9 screening strategy, in which each of the genes coding for the nodes can be interrupted in  
512 individual immortalized cells, and then expanding these into cell lines. This would make it  
513 possible to ascertain characteristics of the signalling pathway such as event timing or the  
514 consequences of the absence of each protein. For example, according to our proposed sequence  
515 of events, the first protein to be tested should be Src, which can be initially done by chemically

516 inhibit it and observe whether the activation of CR3 is affected, if so, then a genetic strategy can  
517 be applied. A similar approach would be useful to determine the kinases whose activity overlaps  
518 with that of Syk, in which case a cell culture where Syk is knocked down would be convenient to  
519 test specific inhibitors for different Src family kinases.

520

521 Additionally, the phosphorylation at serine 8 and 10 in the cytoplasmic tail of CD13, which has  
522 not been reported yet, should be evaluated as it could add extra docking sites for accessory  
523 proteins. Such specifics could provide the basis for the design of therapies that inhibit or enhance  
524 cellular activities to prevent spread of cancers in which CD13 is overexpressed.

525

526 Finally, we wish to stress the convenience of this interdisciplinary approach for signalling  
527 transduction studies. In our experience, bioinformatic tools were fundamental for broadening the  
528 reach of a few carefully designed key experiments, and to delineate not one, but two possible  
529 signalling cascades based on them. This rationale has the potential to provide researchers with a  
530 pipeline that has proven to save time and resources in our hands, as well as help refine concrete  
531 future goals.

532

## 533 **MATERIALS AND METHODS**

### 534 **Reagents and antibodies**

535 RPMI-1640 medium was purchased from Gibco Life Technologies (Carlsbad, CA, USA).

536 Recombinant human (rh) M-CSF was from PeproTech (Cranbury, NJ). Lymphoprep was from

537 Axis-Shield PoC AS (Oslo, Norway). All culture media were supplemented with 10% heat



538 inactivated FBS (Invitrogen, Carlsbad, CA, USA) unless otherwise stated, 2 mM L-glutamine,  
539 100 µg/ml streptomycin, 100U/mL penicillin (Sigma-Aldrich, St. Louis, MO, USA), 1 mM  
540 sodium pyruvate solution and 1% MEM non-essential amino acids solution(100X) (Gibco by  
541 Life Technologies, NY, USA). Murine monoclonal IgG1 anti-human CD13 (Mab C) and anti-  
542 human CD32 (Mab IV.3) were produced and purified in our laboratory from supernatants of the  
543 corresponding hybridomas (4). Fab fragments were prepared from the purified antibodies with  
544 immobilized Ficin (Pierce, Rockford, IL), following the manufacturer's instructions. Murine  
545 monoclonal FITC anti-human CD11b (activated) antibody (IgG1, clone CBRM1/5) was from  
546 Biologend (San Diego, CA). Goat anti-mouse (GαM) polyclonal IgG F(ab)'2 fragments were  
547 from Jackson ImmunoResearch (West Grove, PA). Polyclonal FITC rabbit anti-mouse antibody  
548 was purchased from Thermo Fisher Scientific (Waltham, MA). BAY 61-3606 was from Sigma-  
549 Aldrich (St. Louis, MO, USA).

550

## 551 **Cell Culture**

552 All experiments carried out with cells from human donors were performed following the Ethical  
553 Guidelines of the Instituto de Investigaciones Biomédicas, UNAM, Mexico City, Mexico.  
554 Human peripheral blood mononuclear cells (PBMCs) were isolated from anonymous healthy  
555 male donors' buffy coats obtained from the blood bank at Instituto Nacional de Ciencias Médicas  
556 y Nutrición Salvador Zubirán, Secretaría de Salud, Mexico City, Mexico by gradient  
557 centrifugation with Lymphoprep as previously described (4). For monocyte isolation, PBMCs  
558 were washed three times with PBS, pH 7.4 by centrifugation at 400 g for 10 min. After the last  
559 wash, cells were resuspended in serum-free RPMI-1640 medium complemented as described  
560 before and were seeded ( $5-6 \times 10^7$  PBMCs/plate) in 100 mm × 20 mm cell culture-treated

561 polystyrene culture dishes (Corning, New York, NY, USA). Cultures were maintained in a  
562 humidified atmosphere at 37°C with 5% CO<sub>2</sub> for 1 h, to allow monocytes to adhere to the plastic  
563 plate. Non-adherent cells were eliminated by gentle washing, and adherent cells, enriched for  
564 monocytes (≥95% purity, as determined by flow cytometry using CD14 as a marker of the  
565 monocytic population, data not shown), were cultured for 7-10 days for differentiation into  
566 macrophages, in RPMI-1640 medium with 5 ng/ml rh M-CSF complemented as described  
567 before, at 37°C. For experiments, macrophages were harvested by firm and gentle cell scraping.

568

### 569 **CR3 activation**

570 MDMs ( $5 \times 10^5$ ) were incubated in 6-well plates in serum-free supplemented RPMI-1640 medium  
571 for a maximum of 12 h with or without 10 μM BAY, a highly selective and widely used Syk  
572 inhibitor (68–70). One well was harvested by gentle cell scraping at 0, 3, 6 and 12h. From each  
573 harvested sample  $0.25 \times 10^6$  MDMs were incubated in 0.2 ml serum-free supplemented RPMI-  
574 1640 medium with 2.5 μg of mAb C (anti-CD13) Fab fragments for 30 min at 4°C. Cells were  
575 washed three times with the fresh medium and incubated with 4 μg of GαM F(ab)'<sub>2</sub> fragments  
576 for 30 min at 4°C. Immediately after, cells were incubated for 10 min at 37°C. Finally, cells were  
577 fixed with 1% paraformaldehyde (PFA) for 10 min at RT.

578

### 579 **Flow cytometry**

580 To quantitate CR3 activation, fixed samples were washed two times with cold PBS and stained  
581 with 20 μl of a 1:20 dilution of murine monoclonal FITC anti-human CD11b (activated)  
582 antibody (IgG1, CBRM1/5) for 40 min at 4°C. Cells were washed three times with cold PBS.

583 Staining for CD13 or CD32 (Fc $\gamma$ RII) was performed on MDMs by incubation in 10  $\mu$ M anti-  
584 CD13 Fab C or anti-CD32 Fab IV.3 in serum-free supplemented RPMI-1640 medium for 30 min  
585 at 4°C. Cells were washed three times with the same medium and incubated with 1:400 G $\alpha$ M-  
586 FITC antibody for 30 min at 4°C, then washed three times with cold PBS and fixed with 1%  
587 PFA for 10 min at RT. Fluorescence intensity was measured by flow cytometry (Blue/violet  
588 Attune cytometer, Applied Biosystems-Thermo Fisher, Waltham, MA). Flow cytometry data are  
589 displayed as percentages of gated (ssc vs fsc, and singlets) positive cells compared to non-treated  
590 controls

591

## 592 **Theoretical cell signalling interaction network assembly**

593 We constructed the functional protein interaction network of CD13, Syk and CR3 and their  
594 closest partners using combined interaction scores from STRING (32). A functional association  
595 in this context means either physical contact, participation in the same metabolic pathway and/or  
596 cellular process (71). STRING scores are indicators of the likelihood of an interaction, given  
597 currently available evidence in the database, which include gene neighbourhood, gene fusions,  
598 gene co-occurrence, experimental evidence, curated databases, text mining, and protein  
599 homology. Each type of evidence gives rise to an individual score for each pair of proteins.  
600 STRING computes combined scores by integrating the individual scores and correcting for the  
601 probability of randomly observing the interaction. Scores rank from 0 to 1, with 1 being the  
602 highest possible result.

603 The search for functional partners was done individually for each interrogation query (CD13,  
604 CD11b, CD18 and Syk) and focused on human proteins. High confidence scoring molecules (0.8

605 and above) from the first layer of interactions with the query were considered. The resultant  
606 group of proteins were filtered based on the requirements for this particular inside-out signalling  
607 pathway: non-receptor kinases, adaptor proteins able to bridge CD13 to other components of the  
608 pathway, specially Syk, and inhibitory molecules, like protein phosphatases or ubiquitin ligases.  
609 In some cases, other interacting receptors were considered, as they may provide insight into the  
610 reported mechanisms for this type of interaction. Namely those similar to the studied receptors,  
611 CD13 and CR3: metalloproteases, phagocytic receptors, integrins and other adhesion molecules.  
612 To ensure the quality and specificity of the network text mining STRING element, The  
613 GeneCards website (33) and the repository PubMed (34) were used to ascertain the suitability of  
614 each selected protein, i.e. to confirm the function of each node, as well as its gene and protein  
615 expression in myelomonocytic cells. Finally, the interaction network was manually curated  
616 according to experimental evidence gathered from previous publications.

617

## 618 **Statistical analysis**

619 For receptor crosslinking experiments in the absence of BAY, statistical analysis was performed  
620 by means of one-way ANOVA followed by Dunnett's multiple comparisons test or a paired two-  
621 tailed t test in the case of BAY-incubated cells and their controls. P values below 0.05 were  
622 considered significant.

623

## 624 **Supplementary Materials**

625 Fig. S1. Molecular ontology within the protein interaction network

626 Fig. S2. 65 non-redundant proteins were deemed of interest after the interrogation of databases  
627 using CD13, Syk and CR3 (CD11b/CD18) as queries

628 Fig. S3. Workflow

629 Table S1. Description of the 76 proteins contained in the CD13, CR3 (CD11b/CD18) and Syk  
630 interactions network

631

## 632 **References and Notes:**

633 **The references from number 72 onwards are exclusive to the Supplementary Table 1**

634 1. D. Riemann, A. Kehlen, J. Langner, CD13 - Not just a marker in leukemia typing.  
635 Immunology Today. 20 (1999), pp. 83–88.

636 2. A. H. M. Wong, D. Zhou, J. M. Rini, The x-ray crystal structure of human  
637 aminopeptidase N reveals a novel dimer and the basis for peptide processing. Journal of  
638 Biological Chemistry. 287, 36804–36813 (2012).

639 3. I. Licona-Limón, C. A. Garay-Canales, O. Muñoz-Paletta, E. Ortega, CD13 mediates  
640 phagocytosis in human monocytic cells. Journal of Leukocyte Biology. 98, 85–98 (2015).

641 4. C. A. Garay-Canales, I. Licona-Limón, E. Ortega, Distinct Epitopes on CD13 Mediate  
642 Opposite Consequences for Cell Adhesion. BioMed Research International. 2018 (2018),  
643 doi:10.1155/2018/4093435.

644 5. J. Subramani, M. Ghosh, M. M. Rahman, L. A. Caromile, C. Gerber, K. Rezaul, D. K.  
645 Han, L. H. Shapiro, Tyrosine Phosphorylation of CD13 Regulates Inflammatory Cell–Cell  
646 Adhesion and Monocyte Trafficking. The Journal of Immunology. 191, 3905–3912 (2013).

647 6. J. D. Humphries, A. Byron, M. J. Humphries, Integrin ligands at a glance. Journal of Cell  
648 Science. 119, 3901–3903 (2006).

- 649 7. M. Bednarczyk, H. Stege, S. Grabbe, M. Bros,  $\beta$ 2 Integrins—Multi-Functional  
650 Leukocyte Receptors in Health and Disease. *International Journal of Molecular Sciences*. 21  
651 (2020), , doi:10.3390/ijms21041402.
- 652 8. J. S. Amberger, C. A. Bocchini, F. Schiettecatte, A. F. Scott, A. Hamosh, OMIM.org:  
653 Online Mendelian Inheritance in Man (OMIM®), an Online catalog of human genes and genetic  
654 disorders. *Nucleic Acids Research*. 43, D789–D798 (2015).
- 655 9. P. Bouti, S. D. S. Webbers, S. C. Fagerholm, R. Alon, M. Moser, H. L. Matlung, T. W.  
656 Kuijpers,  $\beta$ 2 Integrin Signaling Cascade in Neutrophils: More Than a Single Function. *Frontiers*  
657 *in Immunology*. 11 (2021), , doi:10.3389/fimmu.2020.619925.
- 658 10. A. Erdei, S. Lukácsi, B. Mácsik-Valent, Z. Nagy-Baló, I. Kurucz, Z. Bajtay, Non-  
659 identical twins: Different faces of CR3 and CR4 in myeloid and lymphoid cells of mice and men.  
660 *Seminars in Cell and Developmental Biology*. 85 (2019), pp. 110–121.
- 661 11. S. Sung, Co-immunostaining of ICAM-1, ICAM-2, and CD31 in Mouse Kidney  
662 Glomeruli. *BIO-PROTOCOL*. 10 (2020), doi:10.21769/bioprotoc.3663.
- 663 12. L. Wen, A. Marki, P. Roy, S. McArdle, H. Sun, Z. Fan, A. R. Gingras, M. H. Ginsberg,  
664 K. Ley, Kindlin-3 recruitment to the plasma membrane precedes high-affinity  $\beta$ 2-integrin and  
665 neutrophil arrest from rolling. *Blood*. 137, 29–38 (2021).
- 666 13. R. O. Hynes, Integrins: Bidirectional, allosteric signaling machines. *Cell*. 110, 673–687  
667 (2002).
- 668 14. C. T. Lefort, Y.-M. Hyun, J. B. Schultz, F.-Y. Law, R. E. Waugh, P. A. Knauf, M. Kim,  
669 Outside-In Signal Transmission by Conformational Changes in Integrin Mac-1. *The Journal of*  
670 *Immunology*. 183, 6460–6468 (2009).

- 671 15. Z. Ou, E. Dolmatova, B. Lassègue, K. K. Griendling,  $\beta$ 1- and  $\beta$ 2-integrins: central  
672 players in regulating vascular permeability and leukocyte recruitment during acute inflammation.  
673 <https://doi.org/10.1152/ajpheart.00518.2020>. 320, H734–H739 (2021).
- 674 16. Y. sheng Liu, L. fen Wang, X. S. Cheng, Y. N. Huo, X. M. Ouyang, L. Y. Liang, Y. Lin,  
675 J. F. Wu, J. L. Ren, B. Guleng, The pattern-recognition molecule mindin binds integrin Mac-1 to  
676 promote macrophage phagocytosis via Syk activation and NF- $\kappa$ B p65 translocation. *Journal of*  
677 *Cellular and Molecular Medicine*. 23, 3402–3416 (2019).
- 678 17. A. Torres-Gomez, J. L. Sanchez-Trincado, V. Toribio, R. Torres-Ruiz, S. Rodríguez-  
679 Perales, M. Yáñez-Mó, P. A. Reche, C. Cabañas, E. M. Lafuente, RIAM-VASP Module Relays  
680 Integrin Complement Receptors in Outside-In Signaling Driving Particle Engulfment. *Cells*. 9  
681 (2020), doi:10.3390/cells9051166.
- 682 18. D. Wang, Q. Guo, A. Wei, A. Li, Differential Binding of Active and Inactive Integrin to  
683 Talin. *Protein Journal*. 37, 280–289 (2018).
- 684 19. S. F. Retta, F. Balzac, M. Avolio, Rap1: A turnabout for the crosstalk between cadherins  
685 and integrins. *European Journal of Cell Biology*. 85 (2006), pp. 283–293.
- 686 20. Z. H. Xue, C. Feng, W. L. Liu, S. M. Tan, A Role of Kindlin-3 in Integrin  $\alpha$ M $\beta$ 2  
687 Outside-In Signaling and the Syk-Vav1-Rac1/Cdc42 Signaling Axis. *PLoS ONE*. 8 (2013),  
688 doi:10.1371/journal.pone.0056911.
- 689 21. Y. Tohyama, H. Yamamura, Protein tyrosine kinase, Syk: A key player in phagocytic  
690 cells. *Journal of Biochemistry*. 145 (2009), pp. 267–273.
- 691 22. D. G. Efremov, S. Turkalj, L. Laurenti, Mechanisms of b cell receptor activation and  
692 responses to b cell receptor inhibitors in b cell malignancies. *Cancers*. 12 (2020), ,  
693 doi:10.3390/cancers12061396.

- 694 23. S. ben Mkaddem, M. Benhamou, R. C. Monteiro, Understanding Fc receptor involvement  
695 in inflammatory diseases: From mechanisms to new therapeutic tools. *Frontiers in Immunology*.  
696 10 (2019), , doi:10.3389/fimmu.2019.00811.
- 697 24. M. Benkisser-Petersen, M. Buchner, A. Dörffel, D. V. M. Marcus, R. Claus, K. Kläsener,  
698 K. Leberecht, M. Burger, C. Dierks, H. Jumaa, F. Malavasi, M. Reth, H. Veelken, J. Duyster, K.  
699 Zirlik, Spleen tyrosine kinase is involved in the cd38 signal transduction pathway in chronic  
700 lymphocytic leukemia. *PLoS ONE*. 11 (2016), doi:10.1371/journal.pone.0169159.
- 701 25. P. Mina-Osorio, L. H. Shapiro, E. Ortega, CD13 in cell adhesion: aminopeptidase N  
702 (CD13) mediates homotypic aggregation of monocytic cells. *Journal of Leukocyte Biology*. 79,  
703 719–730 (2006).
- 704 26. P. Mina-Osorio, E. Ortega, Aminopeptidase N (CD13) functionally interacts with FcγRs  
705 in human monocytes. *Journal of Leukocyte Biology*. 77, 1008–1017 (2005).
- 706 27. M. I. Villaseñor-Cardoso, D. A. Frausto-Del-Río, E. Ortega, Aminopeptidase N (CD13)  
707 Is involved in phagocytic processes in human dendritic cells and macrophages. *BioMed*  
708 *Research International*. 2013 (2013), doi:10.1155/2013/562984.
- 709 28. S. Kiehstaller, C. Ottmann, S. Hennig, MMP activation–associated aminopeptidase N  
710 reveals a bivalent 14-3-3 binding motif. *Journal of Biological Chemistry*. 295, 18266–18275  
711 (2020).
- 712 29. E. Orsó, T. Werner, Z. Wolf, S. Bandulik, W. Kramer, G. Schmitz, Ezetimib influences  
713 the expression of raft-associated antigens in human monocytes. *Cytometry Part A*. 69, 206–208  
714 (2006).



- 715 30. Y. Gai, Y. Jiang, Y. Long, L. Sun, Q. Liu, C. Qin, Y. Zhang, D. Zeng, X. Lan, Evaluation  
716 of an Integrin  $\alpha v \beta 3$  and Aminopeptidase N Dual-Receptor Targeting Tracer for Breast Cancer  
717 Imaging. *Molecular pharmaceutics*. 17, 349–358 (2020).
- 718 31. M. A. Carrascal, M. Silva, J. A. Ferreira, R. Azevedo, D. Ferreira, A. M. N. Silva, D.  
719 Ligeiro, L. L. Santos, R. Sackstein, P. A. Videira, A functional glycoproteomics approach  
720 identifies CD13 as a novel E-selectin ligand in breast cancer. *Biochimica et Biophysica Acta -*  
721 *General Subjects*. 1862, 2069–2080 (2018).
- 722 32. D. Szklarczyk, A. L. Gable, D. Lyon, A. Junge, S. Wyder, J. Huerta-Cepas, M.  
723 Simonovic, N. T. Doncheva, J. H. Morris, P. Bork, L. J. Jensen, C. von Mering, STRING v11:  
724 Protein-protein association networks with increased coverage, supporting functional discovery in  
725 genome-wide experimental datasets. *Nucleic Acids Research*. 47, D607–D613 (2019).
- 726 33. G. Stelzer, N. Rosen, I. Plaschkes, S. Zimmerman, M. Twik, S. Fishilevich, T. Iny Stein,  
727 R. Nudel, I. Lieder, Y. Mazor, S. Kaplan, D. Dahary, D. Warshawsky, Y. Guan-Golan, A. Kohn,  
728 N. Rappaport, M. Safran, D. Lancet, *Current Protocols in Bioinformatics*, in press,  
729 doi:10.1002/cpbi.5.
- 730 34. R. Agarwala, T. Barrett, J. Beck, D. A. Benson, C. Bollin, E. Bolton, D. Bourexis, J. R.  
731 Brister, S. H. Bryant, K. Canese, M. Cavanaugh, C. Charowhas, K. Clark, I. Dondoshansky, M.  
732 Feolo, L. Fitzpatrick, K. Funk, L. Y. Geer, V. Gorelenkov, A. Graeff, W. Hlavina, B. Holmes,  
733 M. Johnson, B. Kattman, V. Khotomlianski, A. Kimchi, M. Kimelman, M. Kimura, P. Kitts, W.  
734 Klimke, A. Kotliarov, S. Krasnov, A. Kuznetsov, M. J. Landrum, D. Landsman, S. Lathrop, J.  
735 M. Lee, C. Leubsdorf, Z. Lu, T. L. Madden, A. Marchler-Bauer, A. Malheiro, P. Meric, I.  
736 Karsch-Mizrachi, A. Mnev, T. Murphy, R. Orris, J. Ostell, C. O’Sullivan, V. Palanigobu, A. R.  
737 Panchenko, L. Phan, B. Pierov, K. D. Pruitt, K. Rodarmer, E. W. Sayers, V. Schneider, C. L.

- 738 Schoch, G. D. Schuler, S. T. Sherry, K. Siyan, A. Soboleva, V. Soussov, G. Starchenko, T. A.  
739 Tatusova, F. Thibaud-Nissen, K. Todorov, B. W. Trawick, D. Vakatov, M. Ward, E. Yaschenko,  
740 A. Zasytkin, K. Zbicz, Database resources of the National Center for Biotechnology  
741 Information. *Nucleic Acids Research*. 46, D8–D13 (2018).
- 742 35. A. N. Santos, J. Langner, M. Herrmann, D. Riemann, Aminopeptidase N/CD13 is  
743 directly linked to signal transduction pathways in monocytes. *Cellular Immunology*. 201, 22–32  
744 (2000).
- 745 36. P. Mina-Osorio, B. Winnicka, C. O’Conor, C. L. Grant, L. K. Vogel, D. Rodriguez-Pinto,  
746 K. v. Holmes, E. Ortega, L. H. Shapiro, CD13 is a novel mediator of monocytic/endothelial cell  
747 adhesion. *Journal of Leukocyte Biology*. 84, 448–459 (2008).
- 748 37. S. Spinozzi, S. Albini, H. Best, I. Richard, Calpains for dummies: What you need to  
749 know about the calpain family. *Biochimica et Biophysica Acta - Proteins and Proteomics*. 1869  
750 (2021), , doi:10.1016/j.bbapap.2021.140616.
- 751 38. Z. Sun, M. Costell, R. Fässler, Integrin activation by talin, kindlin and mechanical forces.  
752 *Nature Cell Biology*. 21 (2019), pp. 25–31.
- 753 39. Y. Shao, S. Zhang, Y. Zhang, Z. Liu, Recent advance of spleen tyrosine kinase in  
754 diseases and drugs. *International Immunopharmacology*. 90 (2021), ,  
755 doi:10.1016/j.intimp.2020.107168.
- 756 40. A. Oda, H. D. Ochs, L. A. Lasky, S. Spencer, K. Ozaki, M. Fujihara, M. Handa, K.  
757 Ikebuchi, H. Ikeda, CrkL is an adapter for Wiskott-Aldrich syndrome protein and Syk. *Blood*.  
758 97, 2633–2639 (2001).

- 759 41. T. Ichiba, Y. Kuraishi, O. Sakai, S. Nagata, J. Groffen, T. Kurata, S. Hattori, M. Matsuda,  
760 Enhancement of guanine-nucleotide exchange activity of C3G for Rap1 by the expression of  
761 Crk, CrkL, and Grb2. *Journal of Biological Chemistry*. 272, 22215–22220 (1997).
- 762 42. E. A. Cho, P. Zhang, V. Kumar, M. Kavalchuk, H. Zhang, Q. Huang, J. S. Duncan, J.  
763 Wu, Phosphorylation of RIAM by Src Promotes Integrin Activation by Unmasking the PH  
764 Domain of RIAM. *Structure*. 29 (2020), doi:10.1016/j.str.2020.11.011.
- 765 43. A. Torres-Gomez, C. Cabañas, E. M. Lafuente, Phagocytic Integrins: Activation and  
766 Signaling. *Frontiers in Immunology*. 11, 738 (2020).
- 767 44. S. Joshi, A. R. Singh, M. Zulcic, D. L. Durden, A PKC-SHP1 signaling axis desensitizes  
768 Fc $\gamma$  receptor signaling by reducing the tyrosine phosphorylation of CBL and regulates Fc $\gamma$ R  
769 mediated phagocytosis. *BMC Immunology*. 15 (2014), doi:10.1186/1471-2172-15-18.
- 770 45. A. Ortiz-Stern, C. Rosales, Fc $\gamma$ RIIIB stimulation promotes  $\beta$ 1 integrin activation in  
771 human neutrophils. *Journal of Leukocyte Biology*. 77, 787–799 (2005).
- 772 46. A. Saci, W. Q. Liu, M. Vidal, C. Garbay, F. Rendu, C. Bachelot-Loza, Differential effect  
773 of the inhibition of Grb2-SH3 interactions in platelet activation induced by thrombin and by Fc  
774 receptor engagement. *Biochemical Journal*. 363, 717–725 (2002).
- 775 47. T. J. Zheng, E. R. Lofurno, A. R. Melrose, H. H. S. Lakshmanan, J. Pang, K. G. Phillips,  
776 M. E. Fallon, T. C. L. Kohs, A. T. P. Ngo, J. J. Shatzel, M. T. Hinds, O. J. T. McCarty, J. E.  
777 Aslan, Assessment of the effects of Syk and BTK inhibitors on GPVI-mediated platelet signaling  
778 and function. <https://doi.org/10.1152/ajpccell.00296.2020>. 320, C902–C915 (2021).
- 779 48. Z. Lu, T. Hunter, Degradation of activated protein kinases by ubiquitination. *Annual*  
780 *Review of Biochemistry*. 78 (2009), pp. 435–475.

- 781 49. E. Y. Choi, V. v. Orlova, S. C. Fagerholm, S. M. Nurmi, L. Zhang, C. M. Ballantyne, C.  
782 G. Gahmberg, T. Chavakis, Regulation of LFA-1 dependent inflammatory cell recruitment by  
783 Cbl-b and 14-3-3 proteins. *Blood*. 111, 3607–3614 (2008).
- 784 50. V. J. Martinez, L. D. Asico, P. A. Jose, A. C. Tiu, Lipid rafts and dopamine receptor  
785 signaling. *International Journal of Molecular Sciences*. 21 (2020), pp. 1–18.
- 786 51. D. Lingwood, K. Simons, Lipid rafts as a membrane-organizing principle. *Science*. 327  
787 (2010), pp. 46–50.
- 788 52. R. Belizaire, S. H. J. Koochaki, N. D. Udeshi, A. Vedder, L. Sun, T. Svinkina, C.  
789 Hartigan, M. E. McConkey, V. Kovalcik, A. Bizuayehu, C. Stanclift, M. Schenone, S. A. Carr,  
790 E. Padron, B. L. Ebert, CBL mutations drive PI3K/AKT signaling via increased interaction with  
791 LYN and PIK3R1 . *Blood* (2021), doi:10.1182/blood.2020006528.
- 792 53. K. J. Chung, I. Mitroulis, J. R. Wiessner, Y. Y. Zheng, G. Siegert, M. Sperandio, T.  
793 Chavakis, A novel pathway of rapid TLR-triggered activation of integrin-dependent leukocyte  
794 adhesion that requires Rap1 GTPase. *Molecular Biology of the Cell*. 25, 2948–2955 (2014).
- 795 54. J. Labus, K. Wöltje, K. N. Stolte, S. Häckel, K. S. Kim, A. Hildmann, K. Danker, IL-1 $\beta$   
796 promotes transendothelial migration of PBMCs by upregulation of the FN/ $\alpha$ 5 $\beta$ 1 signalling  
797 pathway in immortalised human brain microvascular endothelial cells. *Experimental Cell*  
798 *Research*. 373, 99–111 (2018).
- 799 55. P. Mina-Osorio, I. Soto-Cruz, E. Ortega, A role for galectin-3 in CD13-mediated  
800 homotypic aggregation of monocytes. *Biochemical and Biophysical Research Communications*.  
801 353, 605–610 (2007).

- 802 56. C. A. Fiddler, H. Parfrey, A. S. Cowburn, D. Luo, G. B. Nash, G. Murphy, E. R.  
803 Chilvers, The aminopeptidase CD13 induces homotypic aggregation in neutrophils and impairs  
804 collagen invasion. *PLoS ONE*. 11 (2016), doi:10.1371/journal.pone.0160108.
- 805 57. A. Kido, S. Krueger, C. Haeckel, A. Roessner, Inhibitory effect of antisense  
806 aminopeptidase N (APN/CD13) cDNA transfection on the invasive potential of osteosarcoma  
807 cells. *Clinical and Experimental Metastasis*. 20, 585–592 (2003).
- 808 58. E. Vachon, R. Martin, V. Kwok, V. Cherepanov, C. W. Chow, C. M. Doerschuk, J.  
809 Plumb, S. Grinstein, G. P. Downey, CD44-mediated phagocytosis induces inside-out activation  
810 of complement receptor-3 in murine macrophages. *Blood*. 110, 4492–4502 (2007).
- 811 59. T. Berthold, M. Glaubitz, S. Muschter, S. Groß, R. Palankar, A. Reil, C. A. Helm, T.  
812 Bakchoul, H. Schwertz, J. Bux, A. Greinacher, M. Delcea, Human neutrophil antigen-3a  
813 antibodies induce neutrophil stiffening and conformational activation of CD11b without  
814 shedding of L-selectin. *Transfusion*. 55, 2939–2948 (2015).
- 815 60. N. Li, H. Yang, M. Wang, S. Lü, Y. Zhang, M. Long, Ligand-specific binding forces of  
816 LFA-1 and Mac-1 in neutrophil adhesion and crawling. *Molecular Biology of the Cell*. 29, 408–  
817 418 (2018).
- 818 61. J. T. Schwartz, J. H. Barker, M. E. Long, J. Kaufman, J. McCracken, L.-A. H. Allen,  
819 Natural IgM Mediates Complement-Dependent Uptake of *Francisella tularensis* by Human  
820 Neutrophils via Complement Receptors 1 and 3 in Nonimmune Serum . *The Journal of*  
821 *Immunology*. 189, 3064–3077 (2012).
- 822 62. A. C. Gonzalez, D. Barriales, A. Palacios, M. M. Robledo, N. Navasa, M. Azkargorta, A.  
823 P. Cearra, J. T. Cortazar, I. Escobes, M. A. Pascual-Itoiz, J. Hradiska, J. Kopecky, D. G. Carton,  
824 R. P. Rosales, L. Abecia, E. Atondo, I. Martin, A. Pellon, F. Elortza, H. Rodriguez, J. Anguita,

- 825 Regulation of macrophage activity by surface receptors contained within *Borrelia burgdorferi*-  
826 enriched phagosomal fractions. *PLoS Pathogens*. 15 (2019), doi:10.1371/journal.ppat.1008163.
- 827 63. J. Gabrilovac, B. Čupić, E. Živković, L. Horvat, D. Majhen, Expression, regulation and  
828 functional activities of aminopeptidase N (EC 3.4.11.2; APN; CD13) on murine macrophage  
829 J774 cell line. *Immunobiology*. 216, 132–144 (2011).
- 830 64. G. I. López-Cortés, L. Díaz-Alvarez, E. Ortega, Leukocyte Membrane Enzymes Play the  
831 Cell Adhesion Game. *Frontiers in Immunology*. 0, 4841 (2021).
- 832 65. T. Chabot, Y. Cheraud, F. Fleury, Relationships between DNA repair and RTK-mediated  
833 signaling pathways. *Biochimica et Biophysica Acta - Reviews on Cancer*. 1875 (2021), ,  
834 doi:10.1016/j.bbcan.2020.188495.
- 835 66. A. Mazumder, S. Shiao, S. Haricharan, HER2 Activation and Endocrine Treatment  
836 Resistance in HER2-negative Breast Cancer. *Endocrinology*. 162 (2021),  
837 doi:10.1210/ENDOCR/BQAB153.
- 838 67. T. Tokuhara, N. Hattori, H. Ishida, T. Hirai, M. Higashiyama, K. Kodama, M. Miyake,  
839 Clinical Significance of Aminopeptidase N in Non–Small Cell Lung Cancer. *Clinical Cancer*  
840 *Research*. 12, 3971–3978 (2006).
- 841 68. M. Piedfer, D. Dauzonne, R. Tang, J. N’Guyen, C. Billard, B. Bauvois, Aminopeptidase-  
842 N/CD13 is a potential proapoptotic target in human myeloid tumor cells. *The FASEB Journal*.  
843 25, 2831 (2011).
- 844 69. H. Hashida, A. Takabayashi, M. Kanai, M. Adachi, K. Kondo, N. Kohno, Y. Yamaoka,  
845 M. Miyake, Aminopeptidase N is involved in cell motility and angiogenesis: its clinical  
846 significance in human colon cancer. *Gastroenterology*. 122, 376–386 (2002).

- 847 70. J.-W. Jang, S. Park, E.-Y. Moon, Spleen tyrosine kinase regulates crosstalk of hypoxia-  
848 inducible factor-1 $\alpha$  and nuclear factor (erythroid-derived2)-like 2 for B cell survival | Elsevier  
849 Enhanced Reader. *International Immunopharmacology* 95 (2021), p. 107509.
- 850 71. S. Sahan-Firat, M. Temiz-Resitoglu, D. S. Guden, S. P. Senol, A. N. Sari, M. Cil, D.  
851 Unsal, B. Korkmaz, B. Tunctan, K. U. Malik, C. K. Buharalioglu, NF- $\kappa$ B activation mediates  
852 LPS-or zymosan-induced hypotension and inflammation reversed by BAY61-3606, a selective  
853 Syk inhibitor, in rat models of septic and non-septic shock. *Clinical and Experimental*  
854 *Pharmacology and Physiology*. 46, 173–182 (2019).
- 855 72. C. von Mering, L. J. Jensen, B. Snel, S. D. Hooper, M. Krupp, M. Foglierini, N. Jouffre,  
856 M. A. Huynen, P. Bork, STRING: Known and predicted protein-protein associations, integrated  
857 and transferred across organisms. *Nucleic Acids Research*. 33 (2005), doi:10.1093/nar/gki005.
- 858 73. P. Mina-Osorio, The moonlighting enzyme CD13: old and new functions to target.  
859 *Trends in Molecular Medicine*. 14, 361–371 (2008).
- 860 74. R. A. Fernandes, L. Su, Y. Nishiga, J. Ren, A. M. Bhuiyan, N. Cheng, C. J. Kuo, L. K.  
861 Picton, S. Ohtsuki, R. G. Majzner, S. P. Rietberg, C. L. Mackall, Q. Yin, L. R. Ali, X. Yang, C.  
862 S. Savvides, J. Sage, M. Dougan, K. C. Garcia, Immune receptor inhibition through enforced  
863 phosphatase recruitment. *Nature*. 586, 779–784 (2020).
- 864 75. A. Zeke, M. Misheva, A. Reményi, M. A. Bogoyevitch, JNK Signaling: Regulation and  
865 Functions Based on Complex Protein-Protein Partnerships. *Microbiology and Molecular Biology*  
866 *Reviews*. 80, 793–835 (2016).
- 867 76. T. I. Meier, J. A. Cook, J. E. Thomas, J. A. Radding, C. Horn, T. Lingaraj, M. C. Smith,  
868 Cloning, expression, purification, and characterization of the human Class Ia phosphoinositide 3-  
869 kinase isoforms. *Protein Expression and Purification*. 35, 218–224 (2004).

- 870 77. B. Guyot, G. Mouchiroud, Characterization of promoter elements directing Mona/Gads  
871 molecular adapter expression in T and myelomonocytic cells: involvement of the AML-1  
872 transcription factor. *Journal of Leukocyte Biology*. 73, 263–272 (2003).
- 873 78. X. Shi, S. Pan, Y. Li, W. Ma, H. Wang, C. Xu, L. Li, Xanthoplanine attenuates  
874 macrophage polarization towards M1 and inflammation response via disruption of CrkL-STAT5  
875 complex. *Archives of Biochemistry and Biophysics*. 683 (2020), doi:10.1016/j.abb.2020.108325.
- 876 79. L. C. Plataniias, S. Uddin, E. Bruno, M. Korkmaz, S. Ahmad, Y. Alsayed, D. van den  
877 Berg, B. J. Druker, A. Wickrema, R. Hoffman, CrkL and CrkII participate in the generation of  
878 the growth inhibitory effects of interferons on primary hematopoietic progenitors. *Experimental*  
879 *Hematology*. 27, 1315–1321 (1999).
- 880 80. T. R. Kataoka, A. Kumanogoh, G. Bandara, D. D. Metcalfe, A. M. Gilfillan, CD72  
881 Negatively Regulates KIT-Mediated Responses in Human Mast Cells. *The Journal of*  
882 *Immunology*. 184, 2468–2475 (2010).
- 883 81. Y. Cui, F. Zhou, H. Bai, L. Wei, J. Tan, Z. Zeng, Q. Song, J. Chen, N. Huang, Real-time  
884 QCM-D monitoring of endothelial cells and macrophages adhering and spreading to  
885 SEMA4D/heparin surfaces. *Colloids and Surfaces B: Biointerfaces*. 171, 522–529 (2018).
- 886 82. M. K. Galuppo, E. de Rezende, F. L. Forti, M. Cortez, M. C. Cruz, A. A. Teixeira, R. J.  
887 Giordano, B. S. Stolf, CD100/Sema4D increases macrophage infection by *Leishmania*  
888 (*Leishmania*) *amazonensis* in a CD72 dependent manner. *Frontiers in Microbiology*. 9, 1177  
889 (2018).
- 890 83. R. A. Irizarry-Caro, M. M. McDaniel, G. R. Overcast, V. G. Jain, T. D. Troutman, C.  
891 Pasare, TLR signaling adapter BCAP regulates inflammatory to reparatory macrophage



- 892 transition by promoting histone lactylation. *Proceedings of the National Academy of Sciences of*  
893 *the United States of America.* 117, 30628–30638 (2020).
- 894 84. Y. Miao, M. Jiang, L. Qi, D. Yang, W. Xiao, F. Fang, BCAP Regulates Dendritic Cell  
895 Maturation Through the Dual-Regulation of NF- $\kappa$ B and PI3K/AKT Signaling During Infection.  
896 *Frontiers in Immunology.* 11 (2020), doi:10.3389/fimmu.2020.00250.
- 897 85. T. D. Troutman, W. Hu, S. Fulenchek, T. Yamazaki, T. Kurosaki, J. F. Bazand, C.  
898 Pasare, Role for B-cell adapter for PI3K (BCAP) as a signaling adapter linking Toll-like  
899 receptors (TLRs) to serine/threonine kinases PI3K/Akt. *Proceedings of the National Academy of*  
900 *Sciences of the United States of America.* 109, 273–278 (2012).
- 901 86. Á. M. Lőrincz, V. Szeifert, B. Bartos, D. Szombath, A. Mócsai, E. Ligeti, Different  
902 Calcium and Src Family Kinase Signaling in Mac-1 Dependent Phagocytosis and Extracellular  
903 Vesicle Generation. *Frontiers in Immunology.* 10, 2942 (2019).
- 904 87. S. L. Teitelbaum, The osteoclast and its unique cytoskeleton. *Annals of the New York*  
905 *Academy of Sciences.* 1240, 14–17 (2011).
- 906 88. M. Hedl, R. Sun, C. Huang, C. Abraham, STAT3 and STAT5 Signaling Thresholds  
907 Determine Distinct Regulation for Innate Receptor–Induced Inflammatory Cytokines, and  
908 STAT3 / STAT5 Disease Variants Modulate These Outcomes . *The Journal of Immunology.*  
909 203, 3325–3338 (2019).
- 910 89. S. J. Hyduk, J. Rullo, A. P. Cano, H. Xiao, M. Chen, M. Moser, M. I. Cybulsky, Talin-1  
911 and Kindlin-3 Regulate  $\alpha 4 \beta 1$  Integrin-Mediated Adhesion Stabilization, but Not G Protein-  
912 Coupled Receptor-Induced Affinity Upregulation . *The Journal of Immunology.* 187, 4360–4368  
913 (2011).

- 914 90. M. Kim, C. v. Carman, T. A. Springer, Bidirectional transmembrane signaling by  
915 cytoplasmic domain separation in integrins. *Science*. 301, 1720–1725 (2003).
- 916 91. J. Lim, J. Thompson, R. C. May, N. A. Hotchin, E. Caron, Regulator of G-Protein  
917 Signalling-14 (RGS14) Regulates the Activation of  $\alpha$ M $\beta$ 2 Integrin during Phagocytosis. *PLoS*  
918 *ONE*. 8 (2013), doi:10.1371/journal.pone.0069163.
- 919 92. M. A. Senetar, R. O. McCann, Gene duplication and functional divergence during  
920 evolution of the cytoskeletal linker protein talin. *Gene*. 362, 141–152 (2005).

921  
922

### 923 **Acknowledgments:**

924 The authors thank the technical support from Dr. Claudia A. Garay-Canales, PhD, with cell  
925 biology procedures and from Carlos Castellanos-Barba, MSc, at the National Laboratory of Flow  
926 Cytometry (LabNalCit), Instituto de Investigaciones Biomédicas, UNAM. The authors are also  
927 deeply grateful to Drs. G. Erandi Pérez-Figueroa, Marco A. Alfonzo-Mendez and Bruce Alberts  
928 for their generous suggestions to improve the quality of the manuscript.

929 Laura Díaz-Alvarez is a doctoral candidate in the Posgrado en Ciencias Biológicas UNAM  
930 program, this article constitutes a requirement for the attainment of her PhD degree.

931

### 932 **Funding:**

933

934 Consejo Nacional de Ciencia y Tecnología scholarship 399345 (LDA)  
935 Engineering and Physical Sciences Research Council International Research Collaboration in  
936 Early-Warning Sensing Systems for Infectious Diseases (i-sense) EP/K031953/1.

937 (EG), PAPIIT-DGAPA-UNAM (Universidad Nacional Autónoma de México) grant IN218320

938 (LDA, EO)

939

940 **Author contributions:**

941 Conceptualization, methodology: LDA, MEMS, EO

942 Data curation, formal analysis, investigation and writing of the original draft: LDA

943 Project administration: LDA, EO

944 Supervision: EO, MEMS

945 Visualization, resources, validation and review/editing of manuscript: LDA, MEMS, EG, EO

946 **Competing interests:** Authors declare that they have no competing interests.

947 **Data and materials availability:** All data are available in the main text or the supplementary  
948 materials.

949

950

951

952

953

954

955

956

957

958 **Figures**

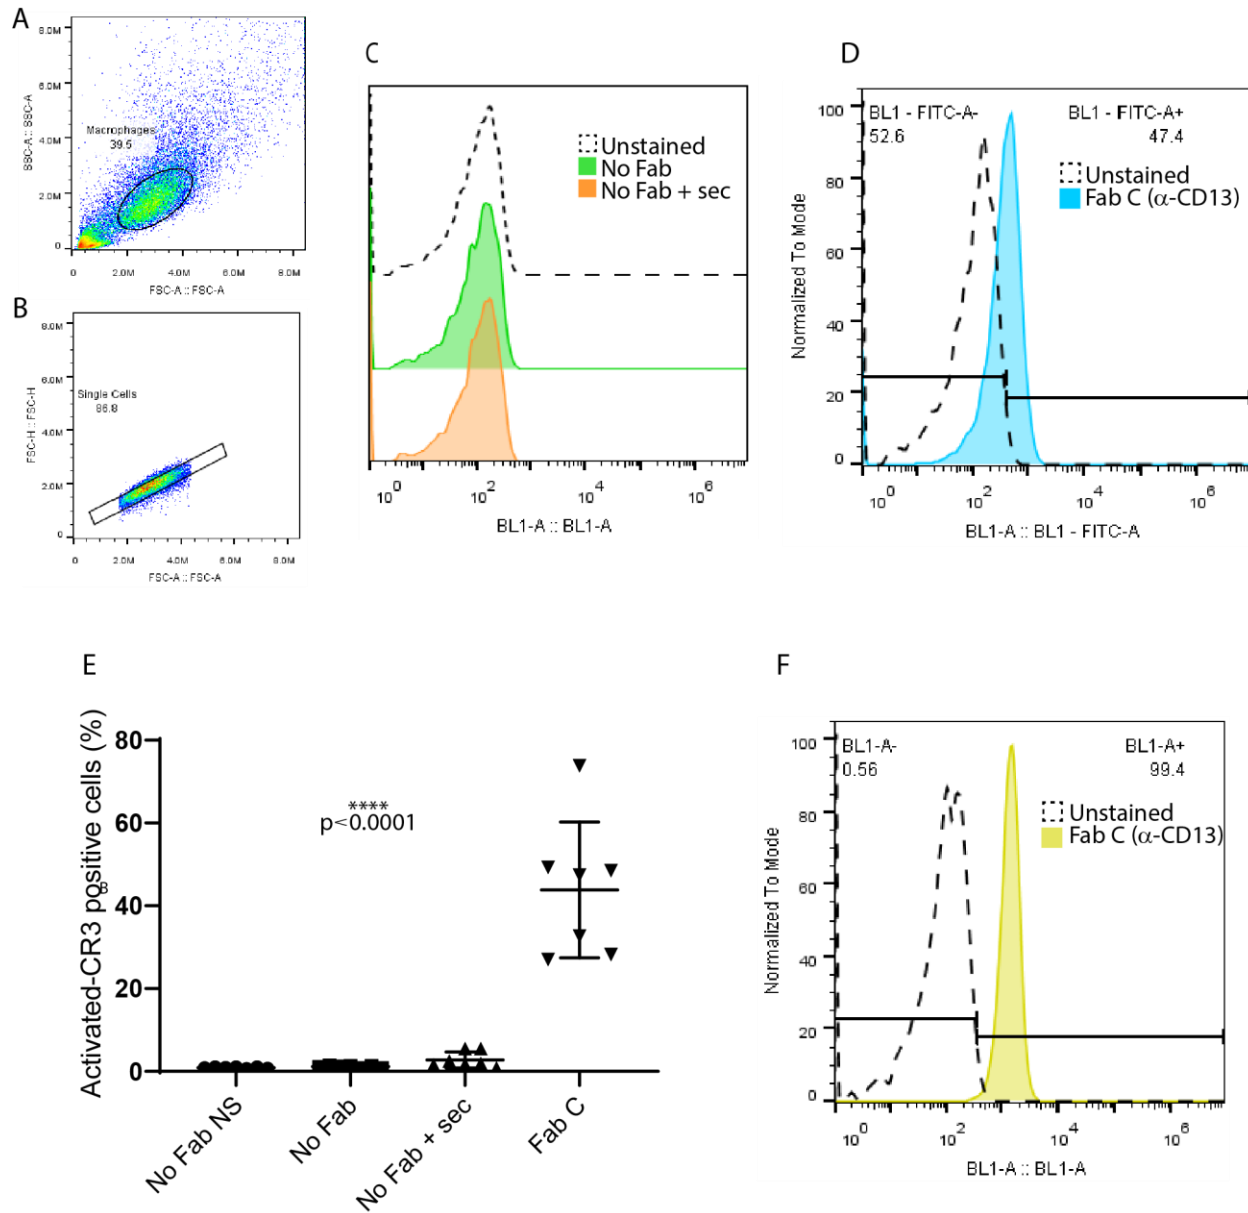

959

960 **Fig 1. CD13 crosslinking activates CR3 in MDMs.** Cells were first gated for size and  
961 granularity (**A**), then for singlets (**B**) and finally for median fluorescence intensity in the BL1  
962 (FITC) channel (**C** and **D**). Controls are shown in panel **C**. In panel **D** a representative histogram  
963 of CR3 activation is shown from a 3h-incubation sample crosslinked with Fab C (anti-CD13) and  
964 secondary antibody F(ab)'2 fragments vs the unstained control. Panel **E** shows the average and

965 standard deviations from 7 independent experiments. An average of 43.8% ( $\pm 16.4$ ) of cells  
966 showed CR3 activation after CD13 crosslinking. A one-way ANOVA followed by a Dunnett's  
967 multiple comparisons test confirms that the difference between samples and controls is  
968 statistically significant, for both tests  $p < 0.0001$  (CI 95% -54 to -31.8). In panel F a representative  
969 histogram is shown, demonstrating that virtually all cells are positive for the CD13 stain.

970

971

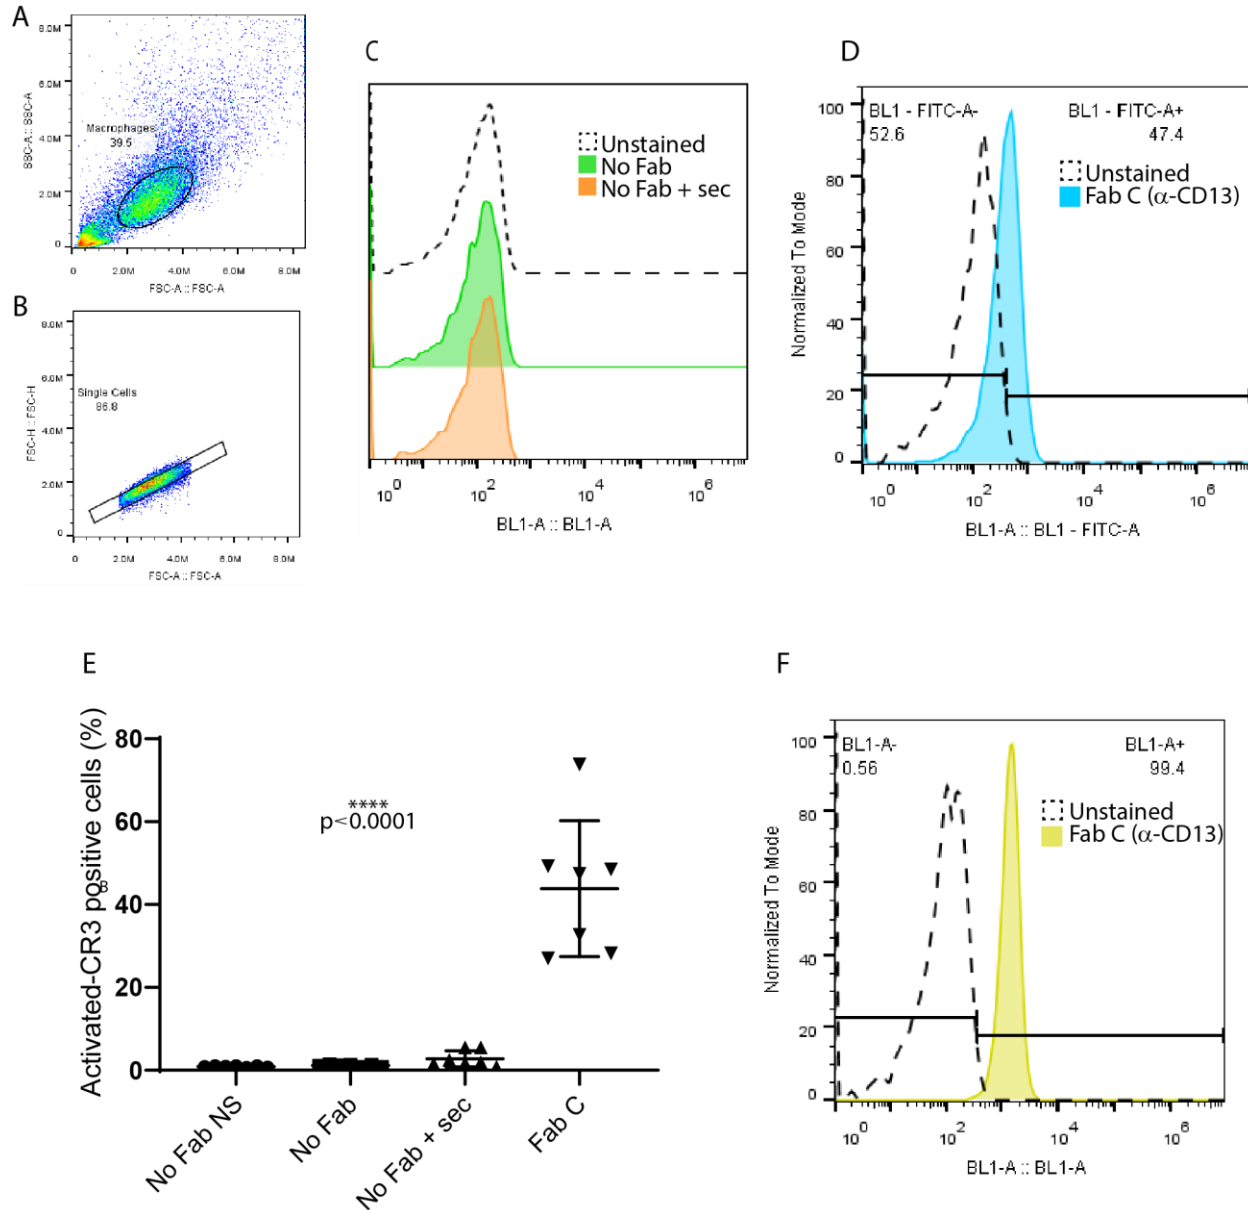

972

973 **Fig. 2. Anti-CD32 crosslinking does not induce CR3 activation in MDMs.** In order to rule out  
974 the possibility that the activation of CR3 occurs as a consequence of the crosslinking of any  
975 immune receptor, MDMs were incubated in serum-free RPMI and CD13 or CD32 on their  
976 surface were crosslinked. Cells incubated without Fab were used as unstained control. Cells were  
977 first gated for size and granularity (A), then for singlets (B) and finally for median fluorescence  
978 intensity in the BL1 (FITC) channel (C). In the histograms from a representative experiment

979 (panel C) it is possible to see that, unlike Fab C (anti-CD13), Fab IV.3 (anti-CD32) does not  
980 induce CR3 activation. Panel D shows the average percentage of CR3-activated cells and  
981 standard deviations from 3 independent experiments. A one-way ANOVA followed by a  
982 Dunnett's multiple comparisons test confirms that the difference between CD13-crosslinked  
983 samples and the rest of the conditions is statistically significant, for both tests  $p < 0.0001$  (CI 95%  
984 -32.7 to -16.3). Inefficient Fab IV.3 binding is not responsible for the lack of CR3 activation  
985 since staining of samples incubated with Fab IV.3, using a secondary R $\alpha$ M-FITC antibody,  
986 reveal that the marker is present on the majority of cells (E).

987

988

989

990

991

992

993

994

995

996

997

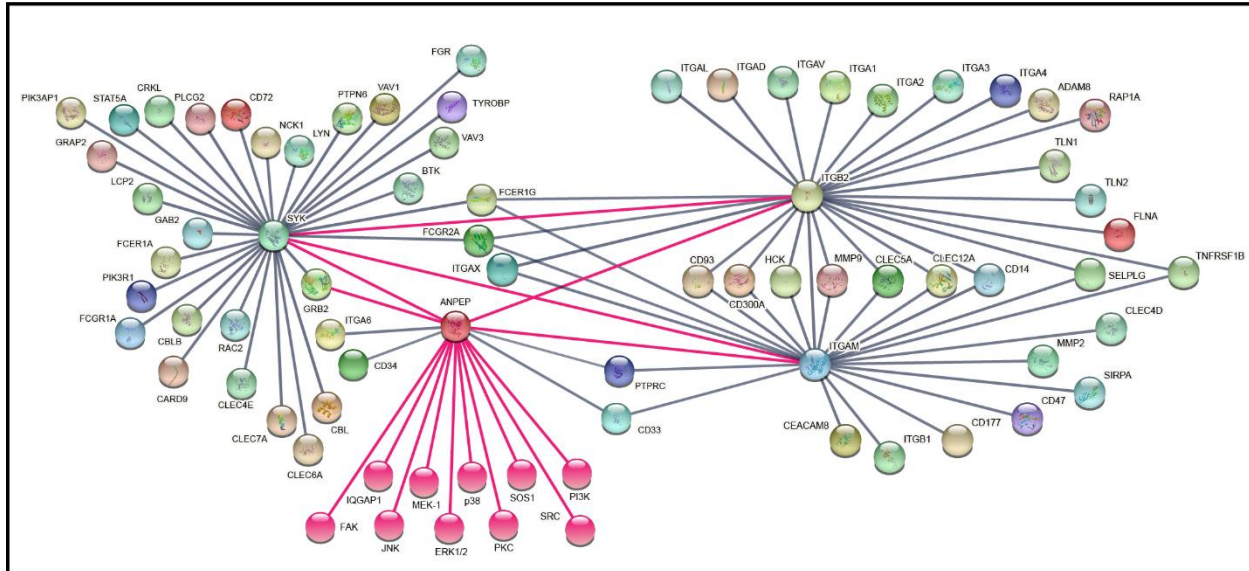

998

999

1000 **Fig. 3. The interaction network of CD13, Syk and CR3 (CD11b/CD18) functional partners**

1001 **comprises 76 proteins.** For Syk, the first layer of interactions with a score above 0.9 consisted  
1002 of 158 proteins, similarly filtered to 29. Both CR3 polypeptide chains were analysed. 167 and  
1003 184 proteins with a score above 0.9 were found for CD11b and CD18, respectively. From these,  
1004 10 were exclusive to CD11b, 13 were exclusive to CD18, 10 were shared between the two of  
1005 them and two with Syk as well. As for CD13, the first layer of interactions consisted of 27  
1006 proteins, which were narrowed down to four. Pink lines and bubbles represent the interactions  
1007 experimentally determined in our laboratory and others, which adds 12 more to the proteins of  
1008 interest. Non-redundant results are depicted.

1009

1010

1011

1012



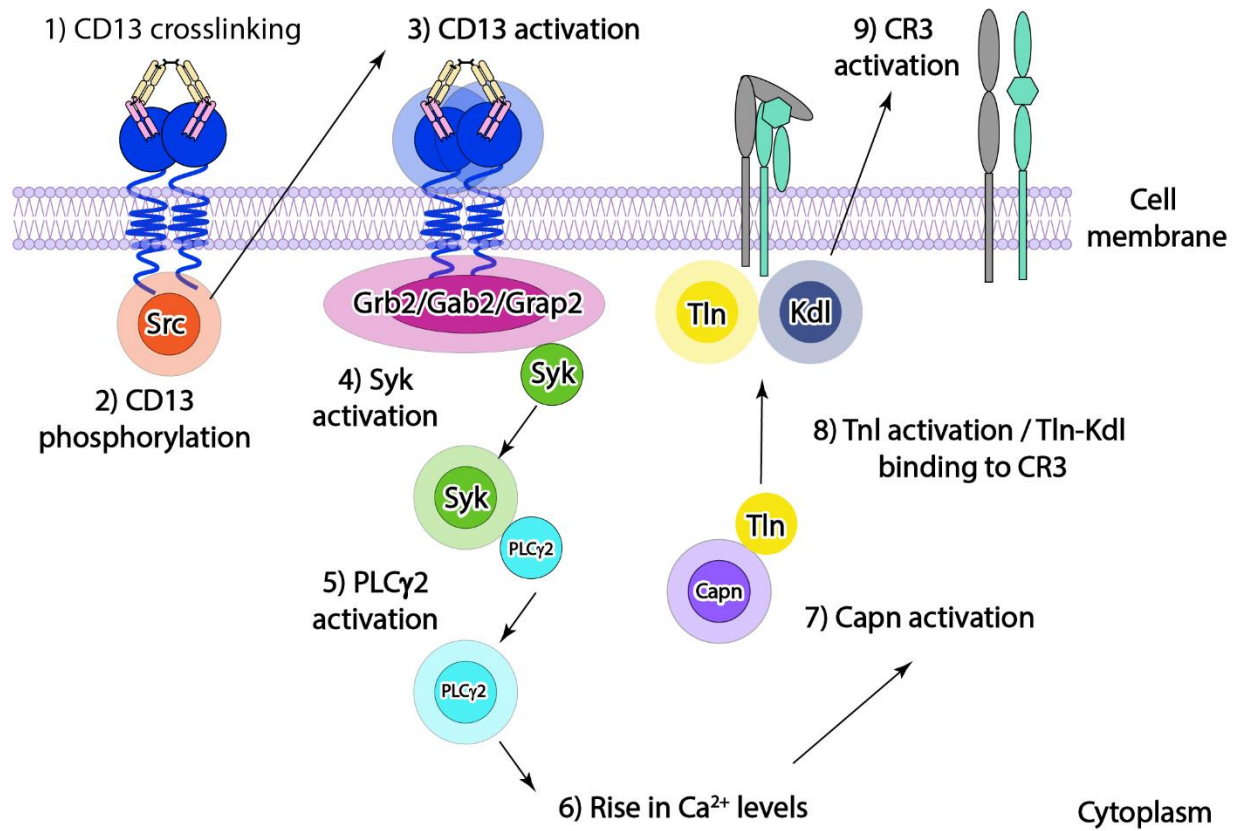

1013

1014 **Fig. 4. CD13 to CR3 inside-out signalling pathway.** Experimental and bioinformatic data were

1015 used to propose an initial CD13-CR3 inside-out signalling pathway. This schematic

1016 representation depicts the main events of this signalling cascade. In it, CD13 is activated upon

1017 crosslinking and Src-mediated phosphorylation, next, an adaptor protein binds this receptor,

1018 allowing Syk to autoactivate. Syk phosphorylates PLC $\gamma$ 2, inducing the PI3K pathway and,

1019 consequently, a rise in Ca<sup>2+</sup> levels. This activates the peptidase Calpain, which cleaves Talin,

1020 then permitting its interaction with Kindlin and subsequent CR3 activation.

1021

1022

1023

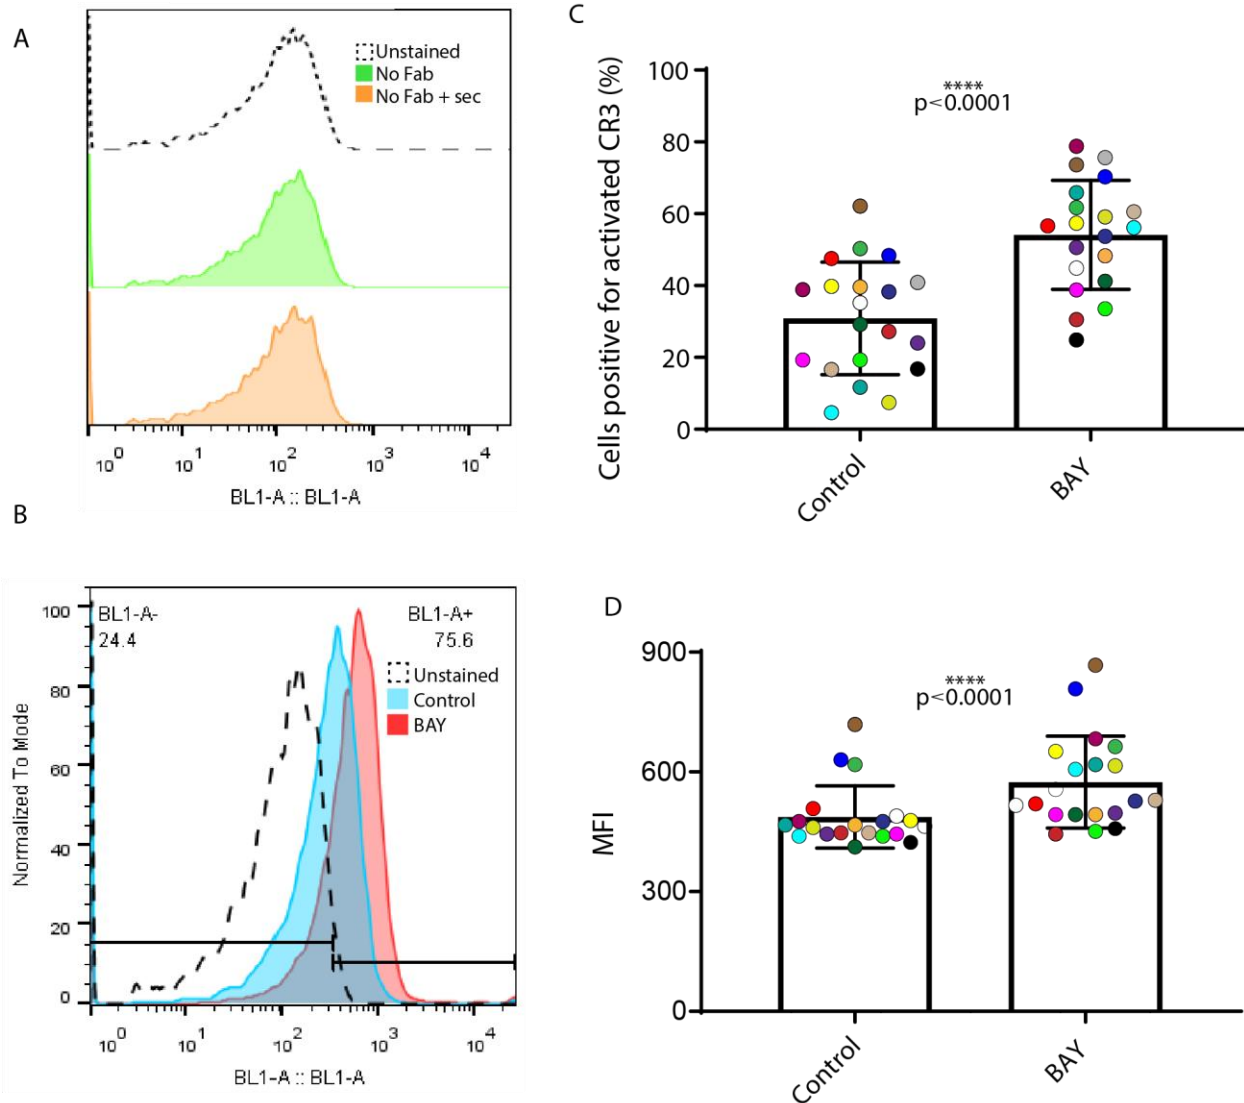

1024

1025 **Fig. 5. The Syk inhibitor, BAY, elevates the percentage of CR3-activated cells in CD13-**  
 1026 **crosslinked MDMs.** Cells were first gated for size and granularity, then for singlets and finally  
 1027 for median fluorescence intensity in the BL1 (FITC) channel (A and B). BAY-incubated controls  
 1028 are shown in panel A. In panel B is possible to appreciate the difference in CR3 activation in  
 1029 representative histograms from a 0h sample and its corresponding control. Panel C shows the  
 1030 percentage of CR3 activation cells plotted for all 20 pairs of matching samples and controls, with  
 1031 each pair colour-matched. An average of 30.8% ( $\pm 16.7$ ) of control cells showed CR3 activation  
 1032 after CD13 crosslinking; this number rises to 54.1% ( $\pm 14.5$ ) of the population on average, when

1033 cells are incubated with BAY. Panel D shows MFI from the same 20 pairs of samples equally  
1034 colour-matched. Average MFI from controls was 487( $\pm$ 78) a.u., increasing to 574 ( $\pm$ 115) a.u. in  
1035 cells incubated with BAY. Two-tailed paired t-test confirmed that the differences were  
1036 statistically significant,  $p < 0.0001$ . CI 95% was 15.4 to 31 for percentages and 55.90 to 118.1 for  
1037 MFI.

1038

1039

1040

1041

1042

1043

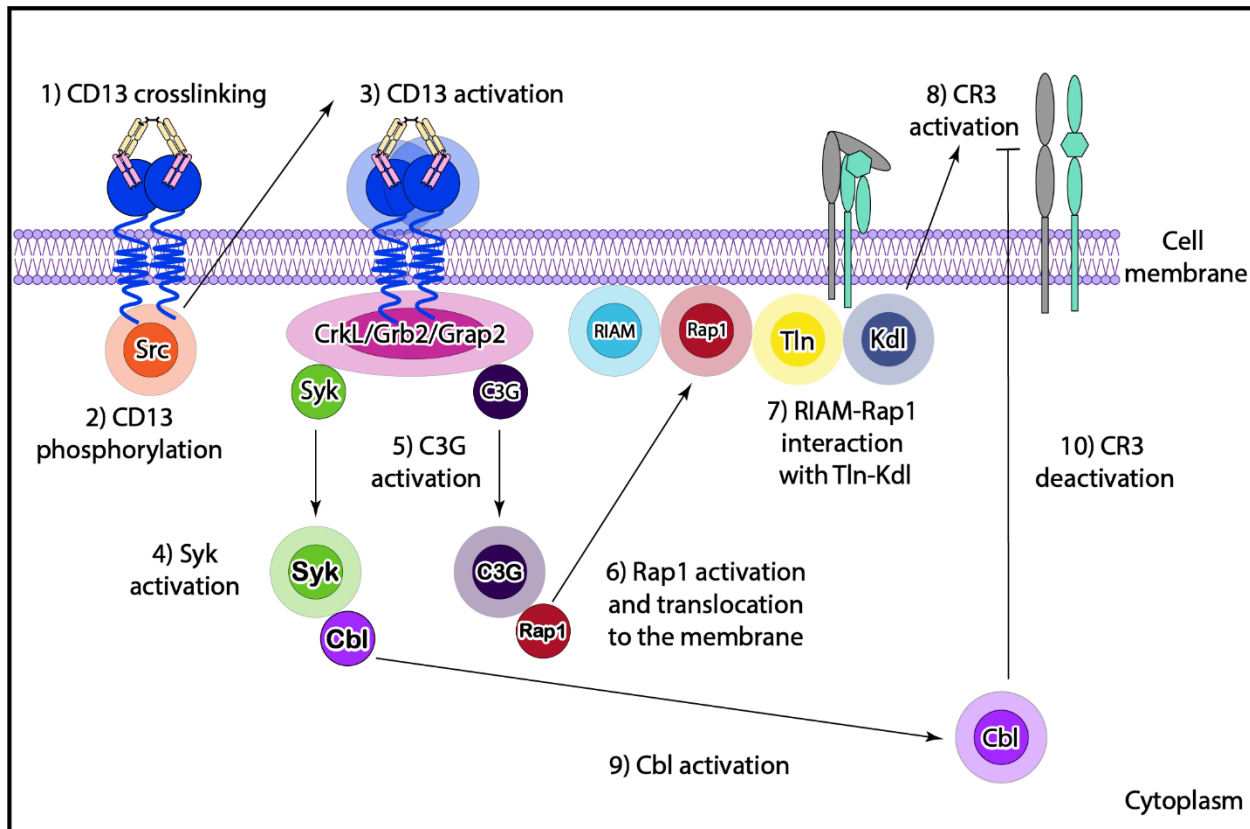

1044

1045

1046 **Fig. 6. Syk is an attenuator of the CD13-CR3 inside-out signalling pathway.** Experimental  
1047 data from CR3-activation experiments in the context of Syk inhibition, suggest that this molecule  
1048 is a regulator of the CD13-CR3 pathway, rather than an activator of it, as initially thought. The  
1049 new hypothesis preserves the initial steps from the one originally proposed: first, CD13  
1050 activation ensues after antibody crosslinking and Src-mediated phosphorylation; secondly,  
1051 adaptor molecule docking on CD13's cytoplasmic tail, followed by Syk auto-activation. Then,  
1052 Ras GEF C3G is activated through its interaction with an adaptor molecule, allowing Rap1  
1053 activation. The RIAM-Rap1-Talin-Kindlin axis then assembles, producing CR3 activation.  
1054 Finally, it is conceivable that Syk activates a member from the ubiquitin ligase Cbl family, which  
1055 deactivates CR3 by ubiquitination of one or more pathway components.
